# Supplementary material for: Cloning of the RNA m6A Methyltransferase 3 and Its Impact on the Proliferation and Differentiation of Quail Myoblasts
Source: MDPI journal article supplement (doi:10.3390/vetsci10040300), 2023-04-18
Supplement: s1 [file s1]

### Quail METTL3 3'RACE

tggcgtaagggaaccctcaaggcttcaaccgcgccctggattgcgacgtcatcgtagccgaggttcgtccaccagcca  
taaaccgatgaaatctatgggatgatcgaacgcctttgcccggaaccgtaaaatcgaactcttcggtcgaccccataac  
gtccaaccgaattggatcacttaggaaccaattggacgggattcatctcttgaccccgacgtcgtggcgcaatttaaca  
acattaccgggatggaatcatctcaaaacccaaaaacatgtaattttaacaccgttttggggccgtttacccaaaaatgatc  
attttaccctgatgatccaaaaacacaaaaaaaaaaaaaaaaaaaaaagt

### Quail METTL3 full mRNA (with CDS italic)

gggtcggaagcgggaaggggctctgaggtggaaggcggggccgcatgtctgatacctggagctccattcaggccca  
*taagaaacaattggattcgctgagggagcggctgcagaggaggaggaagcaggacccgctcgacccccgtcacac*  
*cgacccctctcaacccccctccccccccaccacccctctccattccacccctccagctctgtaggaagttccatctc*  
*aacccctgggggggtgtgggggtctctaccaccccatctacggatgaaggggtccggaattgacccagacccag*  
*cttagaacgtcgattgctgcttcacctcgccgatgtcgccctcactttgccacccgatccggagcgatacggggggct*  
*atcgatacggccgaaacgcccggcgacgcacaacatggtggaaagcctcctccagaagtgcggcccaggagctga*  
*tcgaagtacgtcgcgccctattggccgaaggccccaccatcgtcacctacgccgaccactccaagttggcggccatga*  
*caggctccgaacgagggccgcgacatggaggccgaagtcggcgggaggaagaggagagcggaacaggaaatgtg*  
*cggcggggtaggaggaacggacaggaagtggggaaggaagtgtgaagaatggcggaaacaagcgtccgac*  
*gtggatctggagattgagagtgaagccaggagatcctggagctgtgaacaccaccacggccaaggagcaatccat*  
*cgtggagaagtccgctcgcggggtcgggccagggtccaggaattctgtgaccacggaaccaaagaggaatgcac*  
*aaagccaccggagccgacggccctgcaggaagtgcatttccgtcgcatcatcaaaaaacacaggacgaatcttt*  
*gggcgactgtctcttctcaaacacctgcttccacatggacacctgtaatacgtccactacgagatcgacgcctgtccg*  
*agacccccgccgagaccaccgccccaccgggtcgagaacacggaccggaactaccaggtcacaacccgacgcc*  
*ggcgccgaccgactcttccccacccagtgatctgctgcgacatccgctacctggacgtcagcatcctgggttaagttgc*  
*ggtggtgatggccgacccccgtgggacattcacatggagctgccctacggcaccttgactgacgacgagatgaggc*  
*ggctcaacatccccgtcctacaagacgagggattcctcttctatgggtcacgggaagagccatggagttggccggg*  
*aatgcctgaacctatgggggtacgagcgtgtggacgagatcatctgggtgaagaccaaccagctgcagcgcatcatc*  
*cgcacgggacggacgggacattggctgaaccacggcaaggagcattgtctggttggcgtaagggaaccctcaag*  
*gcttcaaccgcgccctggattgcgacgtcatcgtagccgaggttcgttccaccagccataaacccgatgaaatctatgg*  
*gatgatcgaacgcctttgcccggaaccgtaaaatcgaactcttcggtcgaccccataacgtccaaccgaattggatc*  
*acttaggaaaccaattggacgggattcatctcttgaccccgacgtcgtggcgcaatttaacaacattaccgggatg*  
*gaatcatctcaaaacccaaaaacatgtaattttaacaccgttttggggccgtttacccaaaaatgatcattttaccctg*  
*atgatccaaaaacacaaaaaaaaaaaaaaaaaaaaaagt*

### Quail METTL3 protein sequence (560 aa)

MSDTWSSIQAHKKQLDSLRLQRRRKQDPLDPRHTDPSQPPPPLPTHPPPFH  
PSSSVGSSISTPGGVVGVSTTPSTDEGGPELTPDPALERRLLLHLADVALTLPTD  
AGAIRGAIDTPETPATHNMVESLLQKFAAQELIEVRRGLLAEGPTIVTYADH  
SKLAAMTGSEGRDMEAEVGGRRRAEQEMCGGVGGNGQEVGKEVVKKW  
RKQASDVDLEIESVSQEILELLNTTTAKEQSIVEKFRSRGRAQVQEFCDHGTFE  
ECIKATGADRPCRKLHFRRRIINKHTDESLGDCSFLNTCFHMDTCKYVHYEIDA  
CSETPAETTAPPGREHGPELPRSQPDAGADRLFPPQWICCDIRYLDVSILGKFAV  
VMADPPWDIHMELPYGTLTDDEMRRNLNIPVLQDEGFLFLWVTGRAMELGRE  
CLNLWGYERVDEIIVVKTNQLQRIIRTGRTGHWLNHGKEHCLVGKGNPQGF  
NRGLDCDVIVAEVRSTSHKPDEIYGMIERLSPGTRKIELFGRPHNVQPNWITLG  
NQLDGIHLLDPDVVAQFKQHYPDGIISKPKNM.
