# Supplementary material for: Cloning of the RNA m6A Methyltransferase 3 and Its Impact on the Proliferation and Differentiation of Quail Myoblasts
Source: Vet Sci. 2023 Apr 18;10(4):300. doi: 10.3390/vetsci10040300 (PMC10144998; doi:10.3390/vetsci10040300)
Supplement: Supplementary file 1 [file vetsci-10-00300-s001.zip]

Archive with 6 entries (6 files):
- Figure S1.pdf
- Supplementary file S1.pdf
- Table S1.xlsx
- Table S2.xlsx
- Table S3.xlsx
- Table S4.txt
