# Supplementary material for: Cloning of the RNA m6A Methyltransferase 3 and Its Impact on the Proliferation and Differentiation of Quail Myoblasts
Source: Vet Sci. 2023 Apr 18;10(4):300. doi: 10.3390/vetsci10040300 (PMC10144998; doi:10.3390/vetsci10040300)
Supplement: Supplementary file 1 [file vetsci-10-00300-s001.zip › Table S1.xlsx]

## Sheet: DEGs
gene_id	gene_name	EntrezID	transcript_id	GO	KEGG	KO_ENTRY	EC	Description	trans_type	FPKM.M31	FPKM.M32	FPKM.M33	FPKM.GFP1	FPKM.GFP2	FPKM.GFP3	fc	log2(fc)	pval	qval	regulation	significant
107307025	METTL3	46310	XM_015850477.1	GO:0000398(mRNA splicing, via spliceosome);GO:0001510(RNA methylation);GO:0001734(mRNA (N6-adenosine)-methyltransferase activity);GO:0003723(RNA binding);GO:0003729(mRNA binding);GO:0005515(protein binding);GO:0005634(nucleus);GO:0005737(cytoplasm);GO:0006382(adenosine to inosine editing);GO:0006397(mRNA processing);GO:0006402(mRNA catabolic process);GO:0006974(cellular response to DNA damage sti…	NA	NA	NA	PREDICTED: N6-adenosine-methyltransferase 70 kDa subunit [Coturnix japonica]	NA	3063.88	3175.28	2947.03	5.74768	4.74453	2.22097	722.572	9.497	1.76841e-143	3.00949e-139	up	yes
107315362	HSPA2	20692	XM_015865679.1	GO:0009408(response to heat);GO:0009409(response to cold)	03040(Spliceosome);04141(Protein processing in endoplasmic reticulum);04010(MAPK signaling pathway);04144(Endocytosis);05164(Influenza A)	K03283	NA	hypothetical protein CIB84_016307, partial [Bambusicola thoracicus]	NA	177.193	170.983	166.011	67.0704	66.204	60.355	2.65552	1.40899	1.05572e-53	8.9831e-50	up	yes
107325128	HSPB9	42543	XM_015885650.1	GO:0005515(protein binding);GO:0005829(cytosol);GO:0009408(response to heat);GO:0010243(response to organonitrogen compound);GO:0014070(response to organic cyclic compound);GO:0048471(perinuclear region of cytoplasm)	04330(Notch signaling pathway)	K06062	EC:2.3.1.48	PREDICTED: heat shock protein beta-9 [Coturnix japonica]	NA	317.302	328.739	291.705	93.7204	73.0115	59.1339	4.15178	2.05373	5.46102e-33	3.09786e-29	up	yes
107312110	LOC107312110	13543	XM_015859236.1	GO:0004364(glutathione transferase activity);GO:0006749(glutathione metabolic process)	00480(Glutathione metabolism);00980(Metabolism of xenobiotics by cytochrome P450);00982(Drug metabolism - cytochrome P450);00983(Drug metabolism - other enzymes)	K00799	EC:2.5.1.18	PREDICTED: glutathione S-transferase-like [Coturnix japonica]	NA	0	0	0	0	6.3049	0	4.75821e-05	-14.3592	4.17584e-09	1.77661e-05	down	yes
107307348	LOC107307348	46702	XR_001552383.1	GO:0000122(negative regulation of transcription by RNA polymerase II);GO:0003682(chromatin binding);GO:0005634(nucleus);GO:0048286(lung alveolus development)	NA	NA	NA	PREDICTED: protein capicua homolog, partial [Lepisosteus oculatus]	NA	0	0	0	0	0	12.5798	2.38478e-05	-15.3558	5.35388e-09	1.82225e-05	down	yes
107318881	LOC107318881	29025	XR_001557571.1	NA	NA	NA	NA		NA	1.02177	0.956626	1.02506	0.216587	0.14532	0.165407	5.69576	2.50989	1.65895e-06	0.00470532	up	yes
107307309	LOC107307309	46656	XR_001552375.1	NA	NA	NA	NA		NA	0.324527	0.23243	0.453239	0	0	0	3367.32	11.7174	3.20104e-06	0.00778219	up	yes
107313501	LOC107313501	16414	XM_015861821.1	GO:0005615(extracellular space);GO:0006954(inflammatory response);GO:0006955(immune response);GO:0007186(G-protein coupled receptor signaling pathway);GO:0008009(chemokine activity);GO:0032496(response to lipopolysaccharide);GO:0042127(regulation of cell proliferation);GO:0045236(CXCR chemokine receptor binding);GO:0060326(cell chemotaxis);GO:0070098(chemokine-mediated signaling pathway);GO:00900…	04060(Cytokine-cytokine receptor interaction);04218(Cellular senescence);04620(Toll-like receptor signaling pathway);04621(NOD-like receptor signaling pathway);04622(RIG-I-like receptor signaling pathway);04933(AGE-RAGE signaling pathway in diabetic complications);05132(Salmonella infection);05164(Influenza A)	K10030	NA	PREDICTED: interleukin-8-like [Coturnix japonica]	NA	0.085576	0.366599	0.518139	0	0	0	3234.38	11.6593	2.28955e-05	0.0432928	up	yes
107319253	SLC7A10	29967	XM_015873943.1	GO:0003333(amino acid transmembrane transport);GO:0005887(integral component of plasma membrane);GO:0015194(L-serine transmembrane transporter activity);GO:0015297(antiporter activity);GO:0015825(L-serine transport);GO:0042941(D-alanine transport);GO:0042942(D-serine transport)	NA	NA	NA	PREDICTED: asc-type amino acid transporter 1 [Coturnix japonica]	NA	0	0	0	0.079364	0.146029	0.103023	0.000913476	-10.0963	2.7474e-05	0.0467553	down	yes
107312656	LOC107312656	14414	XR_001554532.1	NA	NA	NA	NA		NA	0	0	0	0.028142	0.063712	0.049544	0.00212167	-8.88058	9.98977e-05	0.154551	down	yes
107323239	LOC107323239	38263	XM_015882106.1	GO:0001963(synaptic transmission, dopaminergic);GO:0005615(extracellular space);GO:0006704(glucocorticoid biosynthetic process);GO:0006954(inflammatory response);GO:0017045(corticotropin-releasing hormone activity);GO:0030324(lung development);GO:0030325(adrenal gland development);GO:0032099(negative regulation of appetite);GO:0035641(locomotory exploration behavior);GO:0051464(positive regulatio…	04730(Long-term depression);05034(Alcoholism);04934(Cushing syndrome)	K05256	NA	PREDICTED: corticoliberin-like [Coturnix japonica]	NA	0	0	0	0.204969	0.189281	0.172683	0.000529163	-10.884	0.000132144	0.187403	down	yes
107318609	LOC107318609	28347	XR_001557414.1	NA	NA	NA	NA		NA	0.0408023	0.0134425	0.0586244	0	0	0	376.231	8.55547	0.000154925	0.202809	up	yes
107315776	LOC107315776	21662	XR_001556052.1	NA	NA	NA	NA		NA	0.249575	0.082755	0.238498	0	0	0	1902.76	10.8939	0.000230152	0.264985	up	yes
107308427	LOC107308427	5741	XR_001552792.1	NA	NA	NA	NA		NA	0	0	0	0.0255257	0.0948946	0.0708084	0.0015688	-9.31612	0.000268966	0.286079	down	yes
107310980	LOC107310980	10980	XR_001553814.1	NA	00240(Pyrimidine metabolism)	K13809	EC:2.7.4.14	rna-directed dna polymerase from mobile element jockey-like [Limosa lapponica baueri]	NA	0	0	0	0.0286802	0.0255528	0.0183166	0.00413511	-7.91786	0.000362711	0.363095	down	yes
107316220	NPS	22767	XM_015867476.1	GO:0005576(extracellular region);GO:0007186(G-protein coupled receptor signaling pathway);GO:0007218(neuropeptide signaling pathway);GO:0008542(visual learning);GO:0010841(positive regulation of circadian sleep/wake cycle, wakefulness);GO:0032230(positive regulation of synaptic transmission, GABAergic);GO:0045760(positive regulation of action potential);GO:0051968(positive regulation of synaptic …	NA	NA	NA	PREDICTED: neuropeptide S [Coturnix japonica]	NA	0.517235	0.06141	0.114666	0	0	0	2311.04	11.1743	0.000420008	0.397095	up	yes
107310015	EMILIN2	9139	XM_015855252.1	GO:0005576(extracellular region);GO:0005581(collagen trimer);GO:0005615(extracellular space);GO:0007155(cell adhesion);GO:0031012(extracellular matrix)	NA	NA	NA	PREDICTED: LOW QUALITY PROTEIN: EMILIN-2 [Coturnix japonica]	NA	0	0	0	0.038863	0.015111	0.033698	0.00342185	-8.19101	0.000487239	0.414592	down	yes
107312152	DLGAP2	13594	XM_015859324.1	GO:0005886(plasma membrane);GO:0007270(neuron-neuron synaptic transmission);GO:0016020(membrane);GO:0019904(protein domain specific binding);GO:0023052(signaling);GO:0030054(cell junction);GO:0030425(dendrite);GO:0045202(synapse);GO:0045211(postsynaptic membrane)	NA	NA	NA	PREDICTED: disks large-associated protein 2 isoform X1 [Coturnix japonica]	NA	0	0	0	0.0193098	0.039595	0.0266903	0.00350488	-8.15642	0.00057697	0.463357	down	yes
107305923	CMYA5	44219	XM_015848627.1	GO:0005515(protein binding);GO:0031430(M band);GO:0048471(perinuclear region of cytoplasm)	NA	NA	NA	PREDICTED: cardiomyopathy-associated protein 5 [Coturnix japonica]	NA	0.016128	0.014843	0.013023	0	0	0	146.647	7.1962	0.000665042	0.492073	up	yes
107317580	LOC107317580	25673	XR_001556936.1	NA	NA	NA	NA		NA	0.059698	0.021411	0.031411	0	0	0	375.067	8.551	0.00129468	0.85792	up	yes
107306558	PLPPR1	45586	XM_015849822.1	GO:0005887(integral component of plasma membrane);GO:0006644(phospholipid metabolic process);GO:0007165(signal transduction);GO:0007399(nervous system development);GO:0042577(lipid phosphatase activity);GO:0046839(phospholipid dephosphorylation)	NA	NA	NA	phospholipid phosphatase-related protein type 1 [Gallus gallus]	NA	0.136369	0.064853	0.127437	0	0	0	1095.53	10.0974	0.00134341	0.85792	up	yes
107321064	ALCAM	3326	XM_015877581.1	GO:0001772(immunological synapse);GO:0002250(adaptive immune response);GO:0005886(plasma membrane);GO:0005887(integral component of plasma membrane);GO:0005925(focal adhesion);GO:0007155(cell adhesion);GO:0007157(heterophilic cell-cell adhesion via plasma membrane cell adhesion molecules);GO:0007411(axon guidance);GO:0008045(motor neuron axon guidance);GO:0009897(external side of plasma membrane)…	04514(Cell adhesion molecules (CAMs))	K06547	NA	PREDICTED: CD166 antigen [Coturnix japonica]	NA	0.06413	0.048039	0.018025	0	0	0	433.98	8.76148	0.00136114	0.85792	up	yes
107314410	LOC107314410	18543	XM_015863609.1	GO:0006629(lipid metabolic process);GO:0016021(integral component of membrane);GO:0016491(oxidoreductase activity);GO:0055114(oxidation-reduction process)	01040(Biosynthesis of unsaturated fatty acids)	K10224	EC:1.14.19.44	PREDICTED: fatty acid desaturase 1-like isoform X1 [Coturnix japonica]	NA	0.088358	0.063186	0.118188	0	0	0	899.107	9.81235	0.00159612	0.953689	up	yes
107322252	LOC107322252	35972	XM_015880106.1	GO:0005096(GTPase activator activity);GO:0005515(protein binding);GO:0005737(cytoplasm);GO:0031175(neuron projection development);GO:0031594(neuromuscular junction);GO:0043195(terminal bouton);GO:0043547(positive regulation of GTPase activity);GO:1902017(regulation of cilium assembly)	NA	NA	NA	PREDICTED: TBC1 domain family member 24-like [Coturnix japonica]	NA	0.121005	0.115146	0.144366	0.263405	0.528861	0.44781	0.30685	-1.7044	0.00190523	0.999939	down	yes
107306201	LOC107306201	436	XR_001552043.1	NA	NA	NA	NA	hypothetical protein N340_08661, partial [Tauraco erythrolophus]	NA	0	0	0	0.161173	0.081248	0.133164	0.000798754	-10.29	0.00196766	0.999939	down	yes
107306972	LOC107306972	46233	XR_001552311.1	GO:0005622(intracellular);GO:0035556(intracellular signal transduction);GO:0046872(metal ion binding)	NA	NA	NA	PREDICTED: LOW QUALITY PROTEIN: tensin-2 [Coturnix japonica]	NA	0	1.59096	1.63675	0	0	0	10759	13.3933	0.00200284	0.999939	up	yes
107307715	LOC107307715	4477	XM_015851234.1	GO:0004341(gluconolactonase activity);GO:0005509(calcium ion binding);GO:0005654(nucleoplasm);GO:0005737(cytoplasm);GO:0008270(zinc ion binding);GO:0019853(L-ascorbic acid biosynthetic process);GO:0030234(enzyme regulator activity);GO:0050790(regulation of catalytic activity)	00030(Pentose phosphate pathway);00053(Ascorbate and aldarate metabolism)	K01053	EC:3.1.1.17	PREDICTED: regucalcin [Coturnix japonica]	NA	0	0	0	0	0.360885	0.289773	0.000461072	-11.0827	0.00250346	0.999939	down	yes
107314843	LOC107314843	19475;19476	XM_015864571.1;XM_015864572.1	GO:0004620(phospholipase activity);GO:0009395(phospholipid catabolic process);GO:0009395(phospholipid catabolic process)	00564(Glycerophospholipid metabolism);00565(Ether lipid metabolism);00590(Arachidonic acid metabolism);00591(Linoleic acid metabolism);00592(alpha-Linolenic acid metabolism);04010(MAPK signaling pathway);04370(VEGF signaling pathway);04217(Necroptosis);04912(GnRH signaling pathway);04270(Vascular smooth muscle contraction);04270(Vascular smooth muscle contraction)	K16342	EC:3.1.1.4	PREDICTED: cytosolic phospholipase A2 epsilon-like isoform X1 [Coturnix japonica];PREDICTED: cytosolic phospholipase A2 epsilon-like isoform X2 [Coturnix japonica]	NA	0	0	0	0.0278566	0.035273	0.0684467	0.00228005	-8.77672	0.00253433	0.999939	down	yes
107306282	LRRC2	45047	XM_015849336.1	GO:0003674(molecular_function);GO:0005575(cellular_component);GO:1990830(cellular response to leukemia inhibitory factor)	NA	NA	NA	PREDICTED: leucine-rich repeat-containing protein 2 isoform X1 [Coturnix japonica]	NA	0.0409723	0.0180681	0.116305	0	0	0	584.484	9.19102	0.0028027	0.999939	up	yes
107325409	LOC107325409	42776	XM_015886233.1	GO:0004252(serine-type endopeptidase activity);GO:0016485(protein processing)	04080(Neuroactive ligand-receptor interaction);04142(Lysosome)	K01319	EC:3.4.21.20	PREDICTED: mast cell protease 1A-like isoform X1 [Coturnix japonica]	NA	0.193892	0.113123	0.0935946	0	0	0	1335.36	10.383	0.00322085	0.999939	up	yes
107306941	LOC107306941	46194	XM_015850346.1	GO:0001880(Mullerian duct regression);GO:0005026(transforming growth factor beta receptor activity, type II);GO:0005515(protein binding);GO:0005524(ATP binding);GO:0005886(plasma membrane);GO:0005887(integral component of plasma membrane);GO:0007165(signal transduction);GO:0007179(transforming growth factor beta receptor signaling pathway);GO:0007548(sex differentiation);GO:0008584(male gonad dev…	04350(TGF-beta signaling pathway);04060(Cytokine-cytokine receptor interaction)	K04672	EC:2.7.11.30	PREDICTED: anti-Muellerian hormone type-2 receptor isoform X4 [Parus major]	NA	0	0	0	0.27468	0.151424	0.116906	0.000552476	-10.8218	0.00336796	0.999939	down	yes
107318849	ACRBP	2806	XM_015873139.1	GO:0001669(acrosomal vesicle);GO:0005634(nucleus);GO:0048240(sperm capacitation)	NA	NA	NA	PREDICTED: acrosin-binding protein isoform X1 [Coturnix japonica]	NA	0	0	0	0.176149	0.020705	0.041406	0.00125913	-9.63336	0.00356758	0.999939	down	yes
107315949	LOC107315949	22072	XM_015866903.1	GO:0001972(retinoic acid binding);GO:0005506(iron ion binding);GO:0005789(endoplasmic reticulum membrane);GO:0006766(vitamin metabolic process);GO:0007417(central nervous system development);GO:0008401(retinoic acid 4-hydroxylase activity);GO:0009952(anterior/posterior pattern specification);GO:0014032(neural crest cell development);GO:0016021(integral component of membrane);GO:0020037(heme bindi…	00830(Retinol metabolism)	K12665	NA	PREDICTED: cytochrome P450 26C1 [Coturnix japonica]	NA	0.063028	0.037194	0.093234	0	0	0	644.853	9.33283	0.00380405	0.999939	up	yes
107306782	LOC107306782	45944	XR_001552264.1	GO:0003682(chromatin binding);GO:0005634(nucleus);GO:0016887(ATPase activity);GO:0031936(negative regulation of chromatin silencing);GO:0042393(histone binding);GO:0045944(positive regulation of transcription by RNA polymerase II)	NA	NA	NA	ATPase family AAA domain-containing protein 2 isoform X1 [Gallus gallus]	NA	1.4705	0.309425	1.40872	0	0.160803	0.239969	7.95626	2.99209	0.00411556	0.999939	up	yes
107325023	MEIOC	42022	XM_015885477.1	GO:0005634(nucleus);GO:0005737(cytoplasm);GO:0006302(double-strand break repair);GO:0007130(synaptonemal complex assembly);GO:0007141(male meiosis I);GO:0007144(female meiosis I);GO:0007283(spermatogenesis);GO:0007286(spermatid development);GO:0048255(mRNA stabilization);GO:0048599(oocyte development);GO:0051310(metaphase plate congression);GO:0051729(germline cell cycle switching, mitotic to mei…	NA	NA	NA	PREDICTED: meiosis-specific coiled-coil domain-containing protein MEIOC [Coturnix japonica]	NA	0.139774	0.082598	0.152407	0.032571	0	0.021996	6.86824	2.77994	0.00462595	0.999939	up	yes
107316803	LOC107316803	24232;24233;24234	XR_001556587.1;XR_001556588.1;XR_001556589.1	GO:0016021(integral component of membrane);GO:0016021(integral component of membrane)	NA	NA	NA	PREDICTED: transmembrane protein 169 [Meleagris gallopavo]	NA	0.0611683	0.0870511	0.132751	0	0	0	936.567	9.87124	0.00467437	0.999939	up	yes
107318873	PGPEP1L	29031	XM_015873190.1	GO:0005829(cytosol);GO:0006508(proteolysis);GO:0016920(pyroglutamyl-peptidase activity)	NA	NA	NA	PREDICTED: pyroglutamyl-peptidase 1-like protein [Coturnix japonica]	NA	0.182186	0.057378	0.042904	0	0	0	941.56	9.87891	0.00594529	0.999939	up	yes
107308381	LOC107308381	5717	XM_015852249.1	NA	NA	NA	NA	PREDICTED: serine/arginine repetitive matrix protein 2-like [Coturnix japonica]	NA	0	0	0	0.112651	0.119613	0.05081	0.00105979	-9.882	0.00604615	0.999939	down	yes
107305714	LOC107305714	43860	XM_015848224.1	GO:0005887(integral component of plasma membrane);GO:0015265(urea channel activity);GO:0071918(urea transmembrane transport);GO:0050839(cell adhesion molecule binding)	NA	NA	NA	PREDICTED: urea transporter 2-like isoform X1 [Coturnix japonica]	NA	0	0	0	0.065496	0.027557	0.084792	0.00168686	-9.21144	0.00607114	0.999939	down	yes
107314677	LOC107314677	19053	XR_001555576.1	GO:0005215(transporter activity);GO:0005635(nuclear envelope);GO:0005737(cytoplasm);GO:0005886(plasma membrane);GO:0005887(integral component of plasma membrane);GO:0006811(ion transport);GO:0006820(anion transport);GO:0008514(organic anion transmembrane transporter activity);GO:0015293(symporter activity);GO:0015893(drug transport);GO:0016020(membrane);GO:0016021(integral component of membrane);…	NA	NA	NA	PREDICTED: solute carrier family 22 member 18-like [Coturnix japonica]	NA	0	0	0	0.136192	0.041699	0.021233	0.0015066	-9.37449	0.00610103	0.999939	down	yes
107322727	SPNS3	36964	XM_015881055.1	GO:0003376(sphingosine-1-phosphate signaling pathway);GO:0005765(lysosomal membrane);GO:0006869(lipid transport);GO:0016021(integral component of membrane);GO:0031982(vesicle);GO:0040011(locomotion);GO:0046624(sphingolipid transporter activity);GO:0055085(transmembrane transport)	NA	NA	NA	PREDICTED: protein spinster homolog 3 [Coturnix japonica]	NA	0	0	0	0.051208	0.069377	0.080031	0.00149539	-9.38526	0.00653654	0.999939	down	yes
107316301	C6H10orf90	22762	XM_015867613.1	GO:0005737(cytoplasm);GO:0005813(centrosome);GO:0015629(actin cytoskeleton)	NA	NA	NA	PREDICTED: centrosomal protein C10orf90 homolog isoform X1 [Coturnix japonica]	NA	0	0	0	0.0549031	0.0275476	0.0188629	0.0029611	-8.39965	0.00664434	0.999939	down	yes
107321809	LOC107321809	35464	XR_001558688.1	NA	NA	NA	NA		NA	0.125683	0.0457204	0.0242085	0	0	0	652.038	9.34881	0.00690229	0.999939	up	yes
107309452	TERT	7885	XM_015854278.1	GO:0000049(tRNA binding);GO:0000333(telomerase catalytic core complex);GO:0001172(transcription, RNA-templated);GO:0001223(transcription coactivator binding);GO:0003721(telomerase RNA reverse transcriptase activity);GO:0003968(RNA-directed 5'-3' RNA polymerase activity);GO:0005730(nucleolus);GO:0007004(telomere maintenance via telomerase);GO:0007005(mitochondrion organization);GO:0016605(PML body…	NA	NA	NA	telomerase reverse transcriptase [Coturnix japonica]	NA	0.015873	0.016357	0.065065	0	0	0	324.317	8.34126	0.00690664	0.999939	up	yes
107320698	LOC107320698	3248	XM_015876846.1	GO:0016021(integral component of membrane)	NA	NA	NA	PREDICTED: cell cycle control protein 50C-like [Coturnix japonica]	NA	0	0	0	0	0.091937	0.080065	0.00174417	-9.16325	0.00804558	0.999939	down	yes
107312485	LOC107312485	14387	XM_015859953.1	NA	NA	NA	NA	PREDICTED: basic proline-rich protein-like [Coturnix japonica]	NA	0.272834	0.125224	0.206646	0	0	0.040047	15.0999	3.91646	0.00814971	0.999939	up	yes
107315756	LOC107315756	21497	XM_015866445.1	GO:0005319(lipid transporter activity);GO:0006869(lipid transport)	04975(Fat digestion and absorption)	K14463	NA	PREDICTED: microsomal triglyceride transfer protein large subunit-like [Coturnix japonica]	NA	0.057654	0.02537	0.049495	0.117871	0.184789	0.14683	0.294821	-1.76209	0.00819491	0.999939	down	yes
107319183	LOC107319183	29454	XR_001557656.1	NA	NA	NA	NA		NA	0.201088	0.184951	0.036855	0	0	0.027522	15.3657	3.94164	0.00946324	0.999939	up	yes
107320189	LOC107320189	3138;3139	XM_015875830.1;XM_015875839.1	GO:0004623(phospholipase A2 activity);GO:0005509(calcium ion binding);GO:0005576(extracellular region);GO:0016042(lipid catabolic process);GO:0016042(lipid catabolic process)	00564(Glycerophospholipid metabolism);00565(Ether lipid metabolism);00590(Arachidonic acid metabolism);00591(Linoleic acid metabolism);00592(alpha-Linolenic acid metabolism);04270(Vascular smooth muscle contraction);04270(Vascular smooth muscle contraction)	K01047	EC:3.1.1.4	PREDICTED: group 10 secretory phospholipase A2-like isoform X1 [Coturnix japonica];PREDICTED: group 10 secretory phospholipase A2-like isoform X2 [Coturnix japonica]	NA	0	0	0	0.0885515	0.0983714	0	0.00160494	-9.28327	0.0103093	0.999939	down	yes
107319672	LOC107319672	3017	XR_001557878.1	NA	NA	NA	NA		NA	0	0	0.00915195	0.0253479	0.0434977	0.0931913	0.0564807	-4.1461	0.0105055	0.999939	down	yes
107320165	LOC107320165	3132;3137	XM_015875786.1;XM_015875803.1	GO:0002377(immunoglobulin production);GO:0005615(extracellular space);GO:0006955(immune response);GO:0016020(membrane);GO:0016021(integral component of membrane);GO:0016021(integral component of membrane)	NA	NA	NA	PREDICTED: uncharacterized protein LOC107320165 isoform X2 [Coturnix japonica];PREDICTED: uncharacterized protein LOC107320165 isoform X4 [Coturnix japonica]	NA	0	0	0	0.0212215	0.0203992	0.0361616	0.00385692	-8.01833	0.0105867	0.999939	down	yes
107321644	DFNB31	35147	XM_015878737.1	GO:0001895(retina homeostasis);GO:0001917(photoreceptor inner segment);GO:0002141(stereocilia ankle link);GO:0002142(stereocilia ankle link complex);GO:0005515(protein binding);GO:0005737(cytoplasm);GO:0005884(actin filament);GO:0005886(plasma membrane);GO:0005929(cilium);GO:0007605(sensory perception of sound);GO:0010628(positive regulation of gene expression);GO:0016020(membrane);GO:0019904(pro…	NA	NA	NA	PREDICTED: whirlin isoform X1 [Coturnix japonica]	NA	0	0	0	0.055956	0.126067	0	0.00164814	-9.24494	0.0107829	0.999939	down	yes
107308011	HS6ST3	4896	XM_015851553.1	GO:0015015(heparan sulfate proteoglycan biosynthetic process, enzymatic modification);GO:0016021(integral component of membrane);GO:0017095(heparan sulfate 6-O-sulfotransferase activity)	00534(Glycosaminoglycan biosynthesis - heparan sulfate / heparin)	K08103	EC:2.8.2.-	PREDICTED: heparan-sulfate 6-O-sulfotransferase 3 [Coturnix japonica]	NA	0	0	0	0.025188	0.015064	0.011379	0.00581046	-7.42713	0.0114289	0.999939	down	yes
107305781	LOC107305781	44060	XR_001551893.1	NA	NA	NA	NA	hypothetical protein llap_16473 [Limosa lapponica baueri]	NA	0.021095	0.046865	0.057534	0.136468	0.16624	0.102433	0.309754	-1.69081	0.0114695	0.999939	down	yes
107308885	LOC107308885	6766	XR_001552973.1	NA	NA	NA	NA		NA	0.664195	0.678644	0.284182	0.098343	0.185506	0.13968	3.84158	1.9417	0.0117926	0.999939	up	yes
107319629	LOC107319629	30634	XM_015874626.1	GO:0005516(calmodulin binding)	NA	NA	NA	PREDICTED: IQ domain-containing protein F5-like [Coturnix japonica]	NA	0	0	0	0.17782	0.180519	0	0.000837196	-10.2221	0.0129219	0.999939	down	yes
107305868	FYB	44156	XM_015848505.1	GO:0006955(immune response);GO:0015629(actin cytoskeleton)	04015(Rap1 signaling pathway)	K17698	NA	PREDICTED: FYN-binding protein isoform X1 [Coturnix japonica]	NA	0.0407887	0.023486	0.00410725	0	0	0	227.94	7.83251	0.0134025	0.999939	up	yes
107312978	LOC107312978	15384	XM_015860843.1	NA	NA	NA	NA	PREDICTED: translation initiation factor IF-2-like [Coturnix japonica]	NA	4.41653	6.53604	0	0	0	0	36508.6	15.1559	0.0137064	0.999939	up	yes
107319064	CALB2	29465	XM_015873592.1	GO:0005509(calcium ion binding);GO:0005634(nucleus);GO:0005829(cytosol);GO:0005921(gap junction);GO:0043005(neuron projection);GO:0045202(synapse);GO:0051480(regulation of cytosolic calcium ion concentration)	04961(Endocrine and other factor-regulated calcium reabsorption)	K14757	NA	hypothetical protein CIB84_008947 [Bambusicola thoracicus]	NA	0	0	0	0	0.281546	0.172748	0.000660365	-10.5644	0.0142472	0.999939	down	yes
107314846	LOC107314846	19472	XM_015864578.1	GO:0004623(phospholipase A2 activity);GO:0005737(cytoplasm);GO:0009395(phospholipid catabolic process);GO:0046872(metal ion binding)	00564(Glycerophospholipid metabolism);00565(Ether lipid metabolism);00590(Arachidonic acid metabolism);00591(Linoleic acid metabolism);00592(alpha-Linolenic acid metabolism);04010(MAPK signaling pathway);04370(VEGF signaling pathway);04217(Necroptosis);04912(GnRH signaling pathway);04270(Vascular smooth muscle contraction)	K16342	EC:3.1.1.4	PREDICTED: cytosolic phospholipase A2 epsilon-like isoform X2 [Coturnix japonica]	NA	0.0165684	0.050018	0.0120339	0	0	0	262.068	8.0338	0.0145248	0.999939	up	yes
107315267	LOC107315267	20628	XR_001555837.1	NA	NA	NA	NA		NA	0	0	0.078961	0.235646	0.309466	0.493217	0.0760462	-3.71698	0.0149524	0.999939	down	yes
107320235	LOC107320235	32048;32047	XR_001558184.1;XR_001558183.1	NA	NA	NA	NA		NA	0.0541791	0.0364291	0	0	0	0	302.027	8.23854	0.0151107	0.999939	up	yes
107310350	LOC107310350	9796	XM_015855901.1	GO:0005509(calcium ion binding);GO:0005886(plasma membrane);GO:0007155(cell adhesion);GO:0007156(homophilic cell adhesion via plasma membrane adhesion molecules);GO:0016020(membrane);GO:0016021(integral component of membrane)	NA	NA	NA	PREDICTED: neural-cadherin-like [Coturnix japonica]	NA	0	0	0	0.006771	0.008398	0.022043	0.00806192	-6.95466	0.0151444	0.999939	down	yes
107314057	SLC34A2	17264;17266	XM_015862928.1;XM_015862930.1	GO:0005315(inorganic phosphate transmembrane transporter activity);GO:0005436(sodium:phosphate symporter activity);GO:0005737(cytoplasm);GO:0005903(brush border);GO:0015321(sodium-dependent phosphate transmembrane transporter activity);GO:0016324(apical plasma membrane);GO:0030643(cellular phosphate ion homeostasis);GO:0031982(vesicle);GO:0031982(vesicle)	NA	NA	NA	PREDICTED: sodium-dependent phosphate transport protein 2B isoform X1 [Coturnix japonica]	NA	0.00939032	0.0134231	0.0172934	0	0	0	133.689	7.06274	0.0157681	0.999939	up	yes
107310178	LOC107310178	9418	XR_001553515.1	NA	NA	NA	NA		NA	0.069052	0	0.027785	0	0	0	322.79	8.33445	0.016017	0.999939	up	yes
107313124	LOC107313124	158	XM_015861114.1	NA	NA	NA	NA	PREDICTED: serine/arginine repetitive matrix protein 1-like [Coturnix japonica]	NA	0	0	0	0.051495	0.113412	0.095533	0.0011519	-9.76177	0.0169463	0.999939	down	yes
107323635	FGL2	389	XM_015882966.1	GO:0006508(proteolysis);GO:0008233(peptidase activity);GO:0009986(cell surface);GO:0010952(positive regulation of peptidase activity);GO:0016504(peptidase activator activity);GO:0070062(extracellular exosome)	NA	NA	NA	hypothetical protein H355_005668 [Colinus virginianus]	NA	0.055701	0.030371	0.00958	0	0	0	318.84	8.31669	0.0170072	0.999939	up	yes
107314716	LOC107314716	19131	XR_001555600.1	GO:0005576(extracellular region)	NA	NA	NA	ovomucin isoform X1 [Gallus gallus]	NA	0.132878	0	0.034791	0	0	0	558.897	9.12644	0.0177582	0.999939	up	yes
107319555	LOC107319555	30458;30462;30457	XR_001557857.1;XR_001557855.1;XR_001557854.1	NA	NA	NA	NA	hypothetical protein AS27_03062, partial [Aptenodytes forsteri]	NA	0.0708241	0.095718	0.129438	0.0324997	0.0537456	0.0557053	2.08509	1.06011	0.0185934	0.999939	up	yes
107311043	SPATA17	11219;11220	XM_015857265.1;XM_015857266.1	GO:0005516(calmodulin binding);GO:0005737(cytoplasm);GO:0005737(cytoplasm)	NA	NA	NA	PREDICTED: spermatogenesis-associated protein 17 isoform X1 [Coturnix japonica];PREDICTED: spermatogenesis-associated protein 17 isoform X2 [Coturnix japonica]	NA	0.620977	0.483716	0.654773	0.28799	0.108167	0.35549	2.34081	1.22701	0.0192478	0.999939	up	yes
107309430	RAMP3	7860;7861;7862	XM_015854240.1;XM_015854239.1;XM_015854238.1	GO:0001525(angiogenesis);GO:0001605(adrenomedullin receptor activity);GO:0001664(G-protein coupled receptor binding);GO:0001921(positive regulation of receptor recycling);GO:0005622(intracellular);GO:0005764(lysosome);GO:0005886(plasma membrane);GO:0006816(calcium ion transport);GO:0006886(intracellular protein transport);GO:0007186(G-protein coupled receptor signaling pathway);GO:0007189(adenyla…	04270(Vascular smooth muscle contraction);04270(Vascular smooth muscle contraction)	K08449	NA	PREDICTED: receptor activity-modifying protein 3 isoform X1 [Coturnix japonica];receptor activity-modifying protein 3 isoform X1 [Numida meleagris]	NA	0.127553	0.126558	0.0631012	0	0	0.0349883	9.06624	3.1805	0.0198612	0.999939	up	yes
107323971	UBXN11	39784;39785;39783;39777;39778	XM_015883591.1;XM_015883592.1;XM_015883590.1;XM_015883586.1;XM_015883587.1	GO:0043130(ubiquitin binding);GO:0043161(proteasome-mediated ubiquitin-dependent protein catabolic process);GO:0043161(proteasome-mediated ubiquitin-dependent protein catabolic process)	NA	NA	NA	PREDICTED: UBX domain-containing protein 11 isoform X3 [Coturnix japonica];PREDICTED: UBX domain-containing protein 11 isoform X4 [Coturnix japonica];PREDICTED: UBX domain-containing protein 11 isoform X2 [Coturnix japonica];PREDICTED: UBX domain-containing protein 11 isoform X1 [Coturnix japonica]	NA	0.184127	0.137	0.114073	0.0478652	0.065542	0.0339922	2.95252	1.56195	0.020203	0.999939	up	yes
107311456	LOC107311456	12129	XM_015857953.1	NA	00230(Purine metabolism)	K18438	EC:3.1.4.17;EC:3.1.4.35	PREDICTED: uncharacterized protein LOC107311456 [Coturnix japonica]	NA	0.024525	0.012739	0.038485	0.221274	0.09743	0.39659	0.105899	-3.23924	0.0206491	0.999939	down	yes
107314028	SLC2A9	17413	XM_015862887.1	GO:0005355(glucose transmembrane transporter activity);GO:0005886(plasma membrane);GO:0016021(integral component of membrane);GO:0046415(urate metabolic process);GO:1904659(glucose transmembrane transport)	NA	NA	NA	PREDICTED: solute carrier family 2, facilitated glucose transporter member 9 [Coturnix japonica]	NA	0.237981	0.122275	0.228254	0.087079	0.07066	0.109346	2.20346	1.13977	0.0224946	0.999939	up	yes
107324755	LMOD1	41481	XM_015885082.1	GO:0003779(actin binding);GO:0005523(tropomyosin binding);GO:0005865(striated muscle thin filament);GO:0006936(muscle contraction);GO:0007015(actin filament organization);GO:0030239(myofibril assembly);GO:0051694(pointed-end actin filament capping)	NA	NA	NA	PREDICTED: LOW QUALITY PROTEIN: leiomodin-1 [Meleagris gallopavo]	NA	0.272183	0.320789	0.34691	0.183366	0.129174	0.115088	2.1979	1.13612	0.0228122	0.999939	up	yes
107313066	LOC107313066	15408;15410	XR_001554770.1;XR_001554769.1	NA	NA	NA	NA		NA	0	0	0	0	0.033452	0.058169	0.00327436	-8.25457	0.0230697	0.999939	down	yes
107312710	LOC107312710	14755;14754	XR_001554587.1;XR_001554588.1	NA	04810(Regulation of actin cytoskeleton);04810(Regulation of actin cytoskeleton)	K05750	NA	PREDICTED: nck-associated protein 1 isoform X1 [Meleagris gallopavo]	NA	0	0	0	0.184719	0	0.206699	0.000766444	-10.3495	0.0232701	0.999939	down	yes
107309187	LOC107309187	7429	XR_001553108.1	NA	NA	NA	NA		NA	0.806024	0.471047	0.726723	1.99734	1.06488	1.16487	0.474036	-1.07693	0.0234848	0.999939	down	yes
107325414	ADGRG2	4234	XM_015886244.1	GO:0004930(G-protein coupled receptor activity);GO:0007166(cell surface receptor signaling pathway);GO:0007186(G-protein coupled receptor signaling pathway);GO:0009986(cell surface);GO:0016021(integral component of membrane);GO:0070062(extracellular exosome)	NA	NA	NA	PREDICTED: adhesion G-protein coupled receptor G2 isoform X1 [Coturnix japonica]	NA	0.0372178	0	0.0334496	0	0	0	235.558	7.87994	0.0237268	0.999939	up	yes
107313266	ETNPPL	15900;15898	XM_015861371.1;XM_015861372.1	GO:0030170(pyridoxal phosphate binding);GO:0042802(identical protein binding);GO:0042802(identical protein binding)	00564(Glycerophospholipid metabolism);00564(Glycerophospholipid metabolism)	K14286	EC:4.2.3.2	PREDICTED: ethanolamine-phosphate phospho-lyase isoform X1 [Coturnix japonica]	NA	0.0792277	0	0.0597551	0	0	0	463.276	8.85573	0.0255363	0.999939	up	yes
107307792	LOC107307792	47218	XM_015851295.1	GO:0004731(purine-nucleoside phosphorylase activity);GO:0005737(cytoplasm);GO:0043101(purine-containing compound salvage)	00230(Purine metabolism);00240(Pyrimidine metabolism);00760(Nicotinate and nicotinamide metabolism)	K03783	EC:2.4.2.1	PREDICTED: purine nucleoside phosphorylase-like [Coturnix japonica]	NA	0	2.25665	0	0	0	0	7522.16	12.8769	0.0256531	0.999939	up	yes
107309665	LY86	8253	XM_015854648.1	GO:0031666(positive regulation of lipopolysaccharide-mediated signaling pathway)	NA	NA	NA	PREDICTED: lymphocyte antigen 86 [Coturnix japonica]	NA	0	0.116552	0.199962	0	0	0	1055.05	10.0431	0.0259996	0.999939	up	yes
107316198	LOC107316198	22642	XR_001556224.1	NA	04810(Regulation of actin cytoskeleton);04330(Notch signaling pathway)	K05750	NA	uncharacterized protein LOC112532684 [Gallus gallus]	NA	0.227923	0.107944	0.102767	0.063521	0.055557	0.060242	2.4461	1.29048	0.0262374	0.999939	up	yes
107324766	LOC107324766	41535	XM_015885096.1	GO:0004190(aspartic-type endopeptidase activity);GO:0006508(proteolysis);GO:0007586(digestion)	NA	NA	NA	PREDICTED: embryonic pepsinogen [Coturnix japonica]	NA	0	0	0	0.166703	0	0.158976	0.000921152	-10.0843	0.0264323	0.999939	down	yes
107314584	OVCH2	18805	XM_015863958.1	GO:0004252(serine-type endopeptidase activity);GO:0006508(proteolysis)	NA	NA	NA	PREDICTED: ovochymase-2 isoform X1 [Coturnix japonica]	NA	0.0642449	0.0964772	0.103694	0.0175506	0.0363961	0	4.90143	2.2932	0.0266751	0.999939	up	yes
107312820	CLDN2	14877	XM_015860559.1	GO:0005198(structural molecule activity);GO:0005886(plasma membrane);GO:0005923(bicellular tight junction);GO:0016021(integral component of membrane);GO:0016338(calcium-independent cell-cell adhesion via plasma membrane cell-adhesion molecules);GO:0042802(identical protein binding);GO:0070062(extracellular exosome)	04514(Cell adhesion molecules (CAMs));04530(Tight junction)	K06087	NA	PREDICTED: claudin-2 [Coturnix japonica]	NA	0	0	0	0.071879	0.217603	0	0.00103633	-9.9143	0.0281915	0.999939	down	yes
107316454	LOC107316454	23173	XR_001556357.1	NA	NA	NA	NA		NA	0	0	0	0.113337	0.180892	0.079977	0.000801697	-10.2847	0.0283479	0.999939	down	yes
107325174	LOC107325174	4204	XM_015885769.1	GO:0005215(transporter activity);GO:0005789(endoplasmic reticulum membrane);GO:0005886(plasma membrane);GO:0015721(bile acid and bile salt transport);GO:0016021(integral component of membrane)	NA	NA	NA	PREDICTED: organic solute transporter subunit alpha-like [Coturnix japonica]	NA	0	0.066193	0.156605	0	0	0	742.66	9.53656	0.0286135	0.999939	up	yes
107324216	LOC107324216	4013	XR_001559453.1	NA	NA	NA	NA		NA	0.342865	0.237093	0.209223	0.054056	0.169521	0.134305	2.20514	1.14087	0.028885	0.999939	up	yes
107307769	LOC107307769	47193	XM_015851275.1	GO:0005634(nucleus);GO:0005737(cytoplasm);GO:0005739(mitochondrion);GO:0005811(lipid droplet);GO:0005901(caveola);GO:0006361(transcription initiation from RNA polymerase I promoter);GO:0006363(termination of RNA polymerase I transcription);GO:0016042(lipid catabolic process);GO:0042134(rRNA primary transcript binding)	04371(Apelin signaling pathway);04910(Insulin signaling pathway)	K07188	EC:3.1.1.79	PREDICTED: hormone-sensitive lipase-like [Coturnix japonica]	NA	0	3.0411	0	0	0	0	10137	13.3073	0.0289168	0.999939	up	yes
107324018	LOC107324018	40081	XR_001559390.1	NA	NA	NA	NA	hypothetical protein CIB84_014913, partial [Bambusicola thoracicus]	NA	0.15101	0.133885	0.099415	0.034929	0	0	11.0026	3.45977	0.0295058	0.999939	up	yes
107318141	LOC107318141	27459	XM_015871579.1	GO:0005506(iron ion binding);GO:0008395(steroid hydroxylase activity);GO:0016021(integral component of membrane);GO:0016705(oxidoreductase activity, acting on paired donors, with incorporation or reduction of molecular oxygen);GO:0020037(heme binding);GO:0055114(oxidation-reduction process)	NA	NA	NA	PREDICTED: cytochrome P450 2J6-like [Coturnix japonica]	NA	0.090614	0.03813	0.06895	0	0.018424	0	10.7302	3.42361	0.03008	0.999939	up	yes
107319715	LOC107319715	30712	XM_015874800.1	GO:0005388(calcium-transporting ATPase activity);GO:0005509(calcium ion binding);GO:0005516(calmodulin binding);GO:0005524(ATP binding);GO:0005783(endoplasmic reticulum);GO:0005829(cytosol);GO:0005887(integral component of plasma membrane);GO:0005929(cilium);GO:0006996(organelle organization);GO:0007595(lactation);GO:0007626(locomotory behavior);GO:0008022(protein C-terminus binding);GO:0008361(r…	04020(Calcium signaling pathway);04261(Adrenergic signaling in cardiomyocytes)	K05850	EC:3.6.3.8	hypothetical protein DUI87_23506 [Hirundo rustica rustica]	NA	0	0	0.010411	0.035437	0.038652	0.040604	0.0907728	-3.4616	0.030411	0.999939	down	yes
107316987	LOC107316987	24563	XR_001556663.1	NA	NA	NA	NA		NA	0.065466	0	0.032101	0	0	0	325.223	8.34529	0.0307187	0.999939	up	yes
107325329	RAMP2	42591;42592	XM_015886063.1;XM_015886064.1	GO:0001570(vasculogenesis);GO:0002040(sprouting angiogenesis);GO:0005737(cytoplasm);GO:0005886(plasma membrane);GO:0006171(cAMP biosynthetic process);GO:0006816(calcium ion transport);GO:0006886(intracellular protein transport);GO:0007186(G-protein coupled receptor signaling pathway);GO:0007507(heart development);GO:0008217(regulation of blood pressure);GO:0008277(regulation of G-protein coupled …	04270(Vascular smooth muscle contraction);04270(Vascular smooth muscle contraction)	K08448	NA	PREDICTED: receptor activity-modifying protein 2 [Coturnix japonica]	NA	0.77552	0.526813	0.455221	0.400169	0.18216	0.105051	2.55689	1.35439	0.0319977	0.999939	up	yes
107310598	KCNK9	10240	XM_015856406.1	GO:0005887(integral component of plasma membrane);GO:0022841(potassium ion leak channel activity);GO:0030322(stabilization of membrane potential);GO:0071805(potassium ion transmembrane transport)	NA	NA	NA	PREDICTED: potassium channel subfamily K member 9 isoform X1 [Coturnix japonica]	NA	0	0	0	0	0.0142611	0.0165938	0.00972294	-6.68439	0.0332786	0.999939	down	yes
107309778	SLC9A3	8534;8536;8535	XM_015854847.1;XM_015854849.1;XM_015854848.1	GO:0005515(protein binding);GO:0005886(plasma membrane);GO:0016324(apical plasma membrane);GO:0030165(PDZ domain binding);GO:0031526(brush border membrane);GO:0031526(brush border membrane)	NA	NA	NA	PREDICTED: sodium/hydrogen exchanger 3 isoform X1 [Coturnix japonica];PREDICTED: sodium/hydrogen exchanger 3 isoform X2 [Coturnix japonica]	NA	0.126168	0.0584301	0.119014	0.217139	0.190142	0.247958	0.463361	-1.10979	0.0335869	0.999939	down	yes
107307126	LOC107307126	46401	XR_001552341.1	NA	NA	NA	NA		NA	8.25724	0	7.21736	0	0	0	51582	15.6546	0.0338703	0.999939	up	yes
107305966	LOC107305966	4431	XM_015848712.1	GO:0008152(metabolic process);GO:0008484(sulfuric ester hydrolase activity);GO:0016021(integral component of membrane)	NA	NA	NA	PREDICTED: arylsulfatase H-like [Coturnix japonica]	NA	0.255695	0.1191	0.175853	0.0439114	0.0738604	0	4.67556	2.22514	0.0339604	0.999939	up	yes
107324301	NRGN	40381	XM_015884229.1	GO:0005516(calmodulin binding)	NA	NA	NA	neurogranin [Pipra filicauda]	NA	0	0	0	0.068456	0.059186	0.115163	0.00123556	-9.66062	0.0340852	0.999939	down	yes
107319904	ADAMTS9	31320	XM_015875257.1	GO:0004222(metalloendopeptidase activity);GO:0005615(extracellular space);GO:0005783(endoplasmic reticulum);GO:0006508(proteolysis);GO:0006516(glycoprotein catabolic process);GO:0007275(multicellular organism development);GO:0008237(metallopeptidase activity);GO:0008270(zinc ion binding);GO:0009986(cell surface);GO:0015031(protein transport);GO:0016192(vesicle-mediated transport);GO:0031012(extra…	NA	NA	NA	PREDICTED: A disintegrin and metalloproteinase with thrombospondin motifs 9 isoform X1 [Coturnix japonica]	NA	0	0	0	0.00533766	0.00978127	0.0124959	0.0108637	-6.52434	0.0348049	0.999939	down	yes
107324276	LOC107324276	4024	XM_015884172.1	GO:0005739(mitochondrion);GO:0008131(primary amine oxidase activity);GO:0016021(integral component of membrane);GO:0042420(dopamine catabolic process);GO:0055114(oxidation-reduction process)	00260(Glycine, serine and threonine metabolism);00330(Arginine and proline metabolism);00340(Histidine metabolism);00350(Tyrosine metabolism);00360(Phenylalanine metabolism);00380(Tryptophan metabolism);00982(Drug metabolism - cytochrome P450)	K00274	EC:1.4.3.4	PREDICTED: amine oxidase [flavin-containing] A-like [Coturnix japonica]	NA	0	0.100603	0.040439	0	0	0	470.14	8.87695	0.0357168	0.999939	up	yes
107310846	LOC107310846	10805	XM_015856851.1	GO:0000139(Golgi membrane);GO:0005794(Golgi apparatus);GO:0005975(carbohydrate metabolic process);GO:0008146(sulfotransferase activity);GO:0016020(membrane);GO:0016021(integral component of membrane);GO:0016051(carbohydrate biosynthetic process);GO:0016740(transferase activity)	NA	NA	NA	PREDICTED: carbohydrate sulfotransferase 9-like [Coturnix japonica]	NA	0	0	0	0.007366	0.016721	0.008614	0.00917403	-6.76823	0.0357499	0.999939	down	yes
107305906	ASMT	4443	XM_015848584.1	GO:0017096(acetylserotonin O-methyltransferase activity);GO:0030187(melatonin biosynthetic process);GO:0032259(methylation);GO:0042803(protein homodimerization activity)	00380(Tryptophan metabolism)	K00543	EC:2.1.1.4	PREDICTED: acetylserotonin O-methyltransferase [Coturnix japonica]	NA	0.198524	0.098844	0.160061	0.030247	0.059891	0.101233	2.39027	1.25718	0.0357714	0.999939	up	yes
107317129	LOC107317129	25001;25000	XR_001556745.1;XR_001556746.1	NA	NA	NA	NA		NA	0.0557134	0.0462814	0.0499198	0	0.0143226	0	10.6066	3.40689	0.0359428	0.999939	up	yes
107313040	TRIM2	15279	XM_015860937.1	GO:0005737(cytoplasm);GO:0008270(zinc ion binding)	NA	NA	NA	Tripartite motif-containing protein 2, partial [Cathartes aura]	NA	0	0	0	0.0134417	0.00643633	0.00882058	0.0104535	-6.57988	0.0362653	0.999939	down	yes
107306219	GCNT1	44867;44866	XM_015849169.1;XM_015849170.1	GO:0005802(trans-Golgi network);GO:0008375(acetylglucosaminyltransferase activity);GO:0009101(glycoprotein biosynthetic process);GO:0016020(membrane);GO:0031985(Golgi cisterna);GO:0048729(tissue morphogenesis);GO:0050901(leukocyte tethering or rolling);GO:0060352(cell adhesion molecule production);GO:0060993(kidney morphogenesis);GO:0060993(kidney morphogenesis)	00512(Mucin type O-glycan biosynthesis);00512(Mucin type O-glycan biosynthesis)	K00727	EC:2.4.1.102	PREDICTED: beta-1,3-galactosyl-O-glycosyl-glycoprotein beta-1,6-N-acetylglucosaminyltransferase [Coturnix japonica]	NA	0.121882	0.0667641	0.0587913	0.0412426	0.0320776	0.0208402	2.62783	1.39387	0.0363808	0.999939	up	yes
107318328	SAMD7	27743	XM_015871988.1	GO:0005634(nucleus);GO:0005737(cytoplasm);GO:0010629(negative regulation of gene expression)	NA	NA	NA	PREDICTED: sterile alpha motif domain-containing protein 7 isoform X1 [Coturnix japonica]	NA	0.016678	0.028811	0	0	0	0	151.63	7.24441	0.0379896	0.999939	up	yes
107314319	LOC107314319	18184;18182	XR_001555331.1;XR_001555330.1	NA	NA	NA	NA	ras association domain-containing protein 6 isoform X1 [Numida meleagris]	NA	0.0186461	0	0.00714904	0	0	0	85.9839	6.42599	0.03805	0.999939	up	yes
107306797	LOC107306797	4618;4620	XM_015850162.1;XM_015850148.1	GO:0004909(interleukin-1, Type I, activating receptor activity);GO:0016021(integral component of membrane);GO:0070498(interleukin-1-mediated signaling pathway);GO:0070498(interleukin-1-mediated signaling pathway)	04060(Cytokine-cytokine receptor interaction);04060(Cytokine-cytokine receptor interaction)	K05172	NA	PREDICTED: interleukin-1 receptor type 1-like isoform X1 [Coturnix japonica]	NA	0.0132023	0	0.0660555	0	0	0	264.193	8.04545	0.03831	0.999939	up	yes
gene19563	LOC107306921	46159	gene19563	GO:0008270(zinc ion binding);GO:0016491(oxidoreductase activity);GO:0055114(oxidation-reduction process);GO:0070062(extracellular exosome)	NA	NA	NA	PREDICTED: prostaglandin reductase 1 isoform X1 [Coturnix japonica]	NA	0.36572	1.19099	0.880226	0.327489	0.262941	0	4.1274	2.04523	0.0386237	0.999939	up	yes
107311791	AMDHD1	1283;1284	XM_015858615.1;XM_015858614.1	GO:0003674(molecular_function);GO:0005829(cytosol);GO:0006548(histidine catabolic process);GO:0016812(hydrolase activity, acting on carbon-nitrogen (but not peptide) bonds, in cyclic amides);GO:0019556(histidine catabolic process to glutamate and formamide);GO:0019557(histidine catabolic process to glutamate and formate);GO:0046872(metal ion binding);GO:0050480(imidazolonepropionase activity);GO:…	00340(Histidine metabolism);00340(Histidine metabolism)	K01468	EC:3.5.2.7	PREDICTED: probable imidazolonepropionase isoform X2 [Coturnix japonica];PREDICTED: probable imidazolonepropionase isoform X1 [Coturnix japonica]	NA	0.181549	0	0.0296614	0	0	0	704.036	9.45951	0.0387959	0.999939	up	yes
107314378	LOC107314378	18410	XR_001555388.1	NA	NA	NA	NA		NA	0	0	0	0.169068	0.184493	0	0.00084851	-10.2028	0.0391617	0.999939	down	yes
107316710	DLX2	23864	XM_015868537.1	GO:0060579(ventral spinal cord interneuron fate commitment)	NA	NA	NA	PREDICTED: LOW QUALITY PROTEIN: homeobox protein DLX-2 [Coturnix japonica]	NA	0	0	0	0.124204	0.12858	0	0.00118678	-9.71873	0.0391617	0.999939	down	yes
107317835	KLHL30	26792	XM_015870960.1	GO:0004842(ubiquitin-protein transferase activity);GO:0016567(protein ubiquitination);GO:0031463(Cul3-RING ubiquitin ligase complex)	NA	NA	NA	PREDICTED: kelch-like protein 30 isoform X1 [Coturnix japonica]	NA	0	0.062919	0.069848	0.160926	0.222412	0.167344	0.241096	-2.05232	0.0391816	0.999939	down	yes
107323229	DOK5	38565	XM_015882094.1	GO:0000165(MAPK cascade);GO:0005158(insulin receptor binding);GO:0005622(intracellular);GO:0007169(transmembrane receptor protein tyrosine kinase signaling pathway);GO:0007399(nervous system development);GO:0051386(regulation of neurotrophin TRK receptor signaling pathway)	04013(MAPK signaling pathway - fly)	K20234	NA	PREDICTED: docking protein 5 isoform X1 [Coturnix japonica]	NA	0	0	0	0.124555	0.086475	0	0.0014216	-9.45827	0.0397638	0.999939	down	yes
107323013	LOC107323013	38127	XR_001559129.1	NA	NA	NA	NA		NA	0.107408	0.094918	0.114784	0.04207	0.048902	0.028592	2.65222	1.4072	0.0401333	0.999939	up	yes
107308338	LOC107308338	5616	XM_015852189.1	NA	NA	NA	NA	PREDICTED: proline-rich extensin-like protein EPR1, partial [Coturnix japonica]	NA	0.046228	0.110184	0.077401	0	0	0	779.377	9.60618	0.0402139	0.999939	up	yes
107322706	TMEM132E	37073	XM_015881034.1	GO:0016021(integral component of membrane)	NA	NA	NA	PREDICTED: transmembrane protein 132E [Coturnix japonica]	NA	0	0.032899	0.064236	0	0	0	323.783	8.33888	0.0412331	0.999939	up	yes
107316395	C7H21orf58	22928;22929	XM_015867808.1;XM_015867809.1	GO:0003674(molecular_function);GO:0005575(cellular_component);GO:0008150(biological_process);GO:0008150(biological_process)	NA	NA	NA	PREDICTED: uncharacterized protein C21orf58 homolog isoform X1 [Coturnix japonica];PREDICTED: uncharacterized protein C21orf58 homolog isoform X2 [Coturnix japonica]	NA	0.101144	0.357116	0.162963	0.401094	0.393963	0.606463	0.443249	-1.17381	0.0414208	0.999939	down	yes
107314920	FSIP1	19736	XM_015864754.1	GO:0005515(protein binding);GO:0008150(biological_process);GO:0031514(motile cilium)	03060(Protein export)	K03104	NA	PREDICTED: fibrous sheath-interacting protein 1 isoform X1 [Coturnix japonica]	NA	0.322826	0.162373	0.217117	0.148379	0.076772	0.100372	2.15751	1.10936	0.0422231	0.999939	up	yes
107320337	C1QTNF2	32186	XM_015876074.1	GO:0000187(activation of MAPK activity);GO:0005102(receptor binding);GO:0005581(collagen trimer);GO:0005615(extracellular space);GO:0042802(identical protein binding);GO:0045725(positive regulation of glycogen biosynthetic process);GO:0046321(positive regulation of fatty acid oxidation);GO:0046326(positive regulation of glucose import);GO:0051260(protein homooligomerization);GO:0070208(protein he…	04920(Adipocytokine signaling pathway);03320(PPAR signaling pathway)	K07296	NA	PREDICTED: complement C1q tumor necrosis factor-related protein 2 [Coturnix japonica]	NA	0.1246	0.08417	0.147287	0.250491	0.333593	0.175163	0.468961	-1.09246	0.0426888	0.999939	down	yes
107308676	GRM8	630	XM_015852739.1	GO:0001642(group III metabotropic glutamate receptor activity);GO:0005887(integral component of plasma membrane);GO:0042734(presynaptic membrane);GO:0051966(regulation of synaptic transmission, glutamatergic)	04080(Neuroactive ligand-receptor interaction)	K04608	NA	PREDICTED: metabotropic glutamate receptor 8, partial [Coturnix japonica]	NA	0	0	0	0.016427	0.021076	0.027696	0.0046013	-7.76374	0.0428153	0.999939	down	yes
107308802	CADPS2	654	XM_015852947.1	GO:0005654(nucleoplasm);GO:0005829(cytosol);GO:0009267(cellular response to starvation);GO:0016082(synaptic vesicle priming);GO:0042734(presynaptic membrane);GO:0045211(postsynaptic membrane);GO:0045921(positive regulation of exocytosis);GO:1990504(dense core granule exocytosis)	NA	NA	NA	PREDICTED: calcium-dependent secretion activator 2 isoform X2 [Coturnix japonica]	NA	0.0543927	0	0.0216049	0	0	0	253.325	7.98485	0.0429172	0.999939	up	yes
107307992	LOC107307992	4872	XM_015851532.1	GO:0000139(Golgi membrane);GO:0000165(MAPK cascade);GO:0000185(activation of MAPKKK activity);GO:0003674(molecular_function);GO:0004674(protein serine/threonine kinase activity);GO:0005524(ATP binding);GO:0005575(cellular_component);GO:0005634(nucleus);GO:0005730(nucleolus);GO:0005737(cytoplasm);GO:0005829(cytosol);GO:0006468(protein phosphorylation);GO:0007346(regulation of mitotic cell cycle);G…	NA	NA	NA	PREDICTED: serine/threonine-protein kinase 24-like [Coturnix japonica]	NA	0.383023	0.300478	0.310013	0.095871	0.175151	0.139167	2.42209	1.27625	0.0431637	0.999939	up	yes
107306146	LOC107306146	44722	XR_001552017.1	NA	NA	NA	NA		NA	0.493715	0	0.259212	0	0	0	2509.76	11.2933	0.0435094	0.999939	up	yes
107325717	RAPGEF3	43445	XM_015886859.1	GO:0005886(plasma membrane);GO:0005902(microvillus);GO:0017034(Rap guanyl-nucleotide exchange factor activity);GO:0019904(protein domain specific binding);GO:0030027(lamellipodium);GO:0030175(filopodium);GO:0030864(cortical actin cytoskeleton);GO:0032486(Rap protein signal transduction);GO:0033138(positive regulation of peptidyl-serine phosphorylation);GO:0034242(negative regulation of syncytium …	04261(Adrenergic signaling in cardiomyocytes)	K08014	NA	PREDICTED: LOW QUALITY PROTEIN: rap guanine nucleotide exchange factor 3 [Coturnix japonica]	NA	0.06027	0.037823	0	0	0	0	326.977	8.35304	0.0437691	0.999939	up	yes
107312415	LOC107312415	13980	XM_015859831.1	GO:0005525(GTP binding)	NA	NA	NA	PREDICTED: interferon-induced very large GTPase 1-like [Coturnix japonica]	NA	0.053988	0.060963	0.099491	0	0.020557	0	10.4316	3.38289	0.0437778	0.999939	up	yes
107315041	LOC107315041	20008	XR_001555768.1	NA	NA	NA	NA		NA	0	0	0	0	0.141007	0.103934	0.00122478	-9.67326	0.043827	0.999939	down	yes
107313236	LOC107313236	15720	XR_001554875.1	NA	04120(Ubiquitin mediated proteolysis)	K10260	NA	PREDICTED: F-box/WD repeat-containing protein 7-like [Cyprinus carpio]	NA	0	0	0	0.093354	0.090061	0.045114	0.00131274	-9.5732	0.0439886	0.999939	down	yes
107309089	CALCR	7129	XM_015853563.1	GO:0001669(acrosomal vesicle);GO:0004948(calcitonin receptor activity);GO:0005929(cilium);GO:0007166(cell surface receptor signaling pathway);GO:0007189(adenylate cyclase-activating G-protein coupled receptor signaling pathway);GO:0007204(positive regulation of cytosolic calcium ion concentration);GO:0016021(integral component of membrane);GO:0030279(negative regulation of ossification);GO:003031…	04080(Neuroactive ligand-receptor interaction)	K04576	NA	calcitonin receptor [Patagioenas fasciata monilis]	NA	0.048812	0	0.0308856	0	0	0	265.658	8.05343	0.0443134	0.999939	up	yes
107317107	PHGDH	25012	XM_015869374.1	GO:0004617(phosphoglycerate dehydrogenase activity);GO:0006541(glutamine metabolic process);GO:0006544(glycine metabolic process);GO:0006564(L-serine biosynthetic process);GO:0006566(threonine metabolic process);GO:0009070(serine family amino acid biosynthetic process);GO:0009448(gamma-aminobutyric acid metabolic process);GO:0010468(regulation of gene expression);GO:0019530(taurine metabolic proc…	00260(Glycine, serine and threonine metabolism)	K00058	EC:1.1.1.95;EC:1.1.1.399	PREDICTED: D-3-phosphoglycerate dehydrogenase [Coturnix japonica]	NA	0	0.106907	0.097246	0	0	0	680.51	9.41047	0.0444957	0.999939	up	yes
107310639	LOC107310639	10299	XM_015856472.1	GO:0002320(lymphoid progenitor cell differentiation);GO:0005886(plasma membrane);GO:0008283(cell proliferation);GO:0009986(cell surface);GO:0031225(anchored component of membrane)	NA	NA	NA	PREDICTED: lymphocyte antigen 6E-like [Coturnix japonica]	NA	0.056289	0.161276	0	0.318167	0.355071	0.376968	0.207164	-2.27115	0.0445028	0.999939	down	yes
107318531	LOC107318531	28307	XR_001557399.1	NA	NA	NA	NA		NA	0	0	0	0.078414	0.091559	0	0.00176499	-9.14613	0.0447979	0.999939	down	yes
107325411	LOC107325411	42782	XM_015886236.1	GO:0003677(DNA binding);GO:0003713(transcription coactivator activity);GO:0006355(regulation of transcription, DNA-templated)	NA	NA	NA	PREDICTED: activated RNA polymerase II transcriptional coactivator p15-like [Coturnix japonica]	NA	0.259064	0.411447	0.450083	0.1271	0	0	8.81663	3.14023	0.0451286	0.999939	up	yes
107306515	LOC107306515	45521	XR_001552170.1	GO:0005622(intracellular);GO:0006497(protein lipidation);GO:0006914(autophagy);GO:0019777(Atg12 transferase activity);GO:0032446(protein modification by small protein conjugation);GO:0034263(positive regulation of autophagy in response to ER overload)	04140(Autophagy - animal);04136(Autophagy - other eukaryotes)	K17888	NA	ubiquitin-like-conjugating enzyme ATG10 isoform X1 [Gallus gallus]	NA	0	0	2.53349	0	0	0	8444.97	13.0439	0.0455089	0.999939	up	yes
107315169	TSHR	20228	XM_015865237.1	GO:0004996(thyroid-stimulating hormone receptor activity);GO:0005887(integral component of plasma membrane);GO:0007189(adenylate cyclase-activating G-protein coupled receptor signaling pathway);GO:0007190(activation of adenylate cyclase activity);GO:0007399(nervous system development);GO:0008344(adult locomotory behavior);GO:0008528(G-protein coupled peptide receptor activity);GO:0009755(hormone-…	04080(Neuroactive ligand-receptor interaction)	K04249	NA	PREDICTED: thyrotropin receptor [Coturnix japonica]	NA	0.031851	0	0.040758	0	0	0	242.03	7.91904	0.0497097	0.999939	up	yes
107313801	GABRA2	17084	XM_015862456.1	GO:0004890(GABA-A receptor activity);GO:1902711(GABA-A receptor complex)	04080(Neuroactive ligand-receptor interaction)	K05175	NA	PREDICTED: gamma-aminobutyric acid receptor subunit alpha-2 [Coturnix japonica]	NA	0.012683	0.029016	0	0	0	0	138.997	7.11891	0.0497351	0.999939	up	yes
