# Supplementary material for: Cloning of the RNA m6A Methyltransferase 3 and Its Impact on the Proliferation and Differentiation of Quail Myoblasts
Source: Vet Sci. 2023 Apr 18;10(4):300. doi: 10.3390/vetsci10040300 (PMC10144998; doi:10.3390/vetsci10040300)
Supplement: Supplementary file 1 [file vetsci-10-00300-s001.zip › Table S2.xlsx]

## Sheet: COND1.M3VSGFP
Pathway_ID	KEGG_Level_1	KEGG_Level_2	Pathway_Name	IDs	S	TS	B	TB	Rich.Factor	P.value	Sig.Sign.P	Q.value	Sig.Sign.Q	S_Up_ID	S_Up_Num	S_Down_ID	S_Down_Num	MapID_Count	ZScore
cjo00592	Metabolism	Lipid metabolism	alpha-Linolenic acid metabolism	107314843|LOC107314843, 107320189|LOC107320189, 107314846|LOC107314846	3	45	31	6625	0.0968	0.0011526	**	0.0699342	ns	107314846|LOC107314846	1	107314843|LOC107314843, 107320189|LOC107320189	2	29	0.371391
cjo00591	Metabolism	Lipid metabolism	Linoleic acid metabolism	107314843|LOC107314843, 107320189|LOC107320189, 107314846|LOC107314846	3	45	40	6625	0.075	0.00242768	**	0.0699342	ns	107314846|LOC107314846	1	107314843|LOC107314843, 107320189|LOC107320189	2	36	0.166667
cjo04270	Organismal Systems	Circulatory system	Vascular smooth muscle contraction	107314843|LOC107314843, 107320189|LOC107320189, 107314846|LOC107314846, 107309430|RAMP3, 107325329|RAMP2	5	45	150	6625	0.0333	0.00327817	**	0.0699342	ns	107314846|LOC107314846, 107309430|RAMP3, 107325329|RAMP2	3	107314843|LOC107314843, 107320189|LOC107320189	2	139	2.20529
cjo00565	Metabolism	Lipid metabolism	Ether lipid metabolism	107314843|LOC107314843, 107320189|LOC107320189, 107314846|LOC107314846	3	45	56	6625	0.0536	0.00631544	**	0.0953176	ns	107314846|LOC107314846	1	107314843|LOC107314843, 107320189|LOC107320189	2	53	-0.412082
cjo00564	Metabolism	Lipid metabolism	Glycerophospholipid metabolism	107314843|LOC107314843, 107320189|LOC107320189, 107314846|LOC107314846, 107313266|ETNPPL	4	45	116	6625	0.0345	0.00765	**	0.0953176	ns	107314846|LOC107314846, 107313266|ETNPPL	2	107314843|LOC107314843, 107320189|LOC107320189	2	111	1.8034
cjo00590	Metabolism	Lipid metabolism	Arachidonic acid metabolism	107314843|LOC107314843, 107320189|LOC107320189, 107314846|LOC107314846	3	45	64	6625	0.0469	0.00914122	**	0.0953176	ns	107314846|LOC107314846	1	107314843|LOC107314843, 107320189|LOC107320189	2	61	-1.40841
cjo00340	Metabolism	Amino acid metabolism	Histidine metabolism	107324276|LOC107324276, 107311791|AMDHD1	2	45	23	6625	0.087	0.0104254	*	0.0953176	ns	107324276|LOC107324276, 107311791|AMDHD1	2		0	21	0.436436
cjo00982	Metabolism	Xenobiotics biodegradation and metabolism	Drug metabolism - cytochrome P450	107312110|LOC107312110, 107324276|LOC107324276	2	45	37	6625	0.0541	0.0258458	*	0.172162	ns	107324276|LOC107324276	1	107312110|LOC107312110	1	36	-0.5
cjo04961	Organismal Systems	Excretory system	Endocrine and other factor-regulated calcium reabsorption	107319064|CALB2	1	45	4	6625	0.25	0.0269003	*	0.172162	ns		0	107319064|CALB2	1	3	-1.73205
cjo04013	Environmental Information Processing	Signal transduction	MAPK signaling pathway - fly	107323229|DOK5	1	45	4	6625	0.25	0.0269003	*	0.172162	ns		0	107323229|DOK5	1	3	-0.57735
cjo04975	Organismal Systems	Digestive system	Fat digestion and absorption	107315756|LOC107315756	1	45	5	6625	0.2	0.033514	*	0.182175	ns		0	107315756|LOC107315756	1	4	0
cjo00260	Metabolism	Amino acid metabolism	Glycine, serine and threonine metabolism	107324276|LOC107324276, 107317107|PHGDH	2	45	43	6625	0.0465	0.0341578	*	0.182175	ns	107324276|LOC107324276, 107317107|PHGDH	2		0	42	1.69734
cjo00380	Metabolism	Amino acid metabolism	Tryptophan metabolism	107324276|LOC107324276, 107305906|ASMT	2	45	47	6625	0.0426	0.0402008	*	0.197912	ns	107324276|LOC107324276, 107305906|ASMT	2		0	44	-0.904534
cjo04730	Organismal Systems	Nervous system	Long-term depression	107323239|LOC107323239	1	45	7	6625	0.1429	0.0466099	*	0.213074	ns		0	107323239|LOC107323239	1	7	-1.88982
cjo04370	Environmental Information Processing	Signal transduction	VEGF signaling pathway	107314843|LOC107314843, 107314846|LOC107314846	2	45	65	6625	0.0308	0.0716772	ns	0.289133	ns	107314846|LOC107314846	1	107314843|LOC107314843	1	65	0.496139
cjo04934	Human Diseases	Endocrine and metabolic disease	Cushing syndrome	107323239|LOC107323239	1	45	11	6625	0.0909	0.0722832	ns	0.289133	ns		0	107323239|LOC107323239	1	11	0.301511
cjo04330	Environmental Information Processing	Signal transduction	Notch signaling pathway	107325128|HSPB9, 107316198|LOC107316198	2	45	75	6625	0.0267	0.0916899	ns	0.345185	ns	107325128|HSPB9, 107316198|LOC107316198	2		0	72	0.117851
cjo00053	Metabolism	Carbohydrate metabolism	Ascorbate and aldarate metabolism	107307715|LOC107307715	1	45	15	6625	0.0667	0.0972801	ns	0.345885	ns		0	107307715|LOC107307715	1	15	0.258199
cjo04080	Environmental Information Processing	Signaling molecules and interaction	Neuroactive ligand-receptor interaction	107325409|LOC107325409, 107308676|GRM8, 107309089|CALCR, 107315169|TSHR, 107313801|GABRA2	5	45	377	6625	0.0133	0.11046	ns	0.372075	ns	107325409|LOC107325409, 107309089|CALCR, 107315169|TSHR, 107313801|GABRA2	4	107308676|GRM8	1	316	4.27533
cjo00360	Metabolism	Amino acid metabolism	Phenylalanine metabolism	107324276|LOC107324276	1	45	19	6625	0.0526	0.121618	ns	0.389178	ns	107324276|LOC107324276	1		0	19	-0.458831
cjo05034	Human Diseases	Substance dependence	Alcoholism	107323239|LOC107323239	1	45	25	6625	0.04	0.156926	ns	0.456091	ns		0	107323239|LOC107323239	1	25	-1
cjo03060	Genetic Information Processing	Folding, sorting and degradation	Protein export	107314920|FSIP1	1	45	26	6625	0.0385	0.162675	ns	0.456091	ns	107314920|FSIP1	1		0	25	-1.4
cjo00534	Metabolism	Glycan biosynthesis and metabolism	Glycosaminoglycan biosynthesis - heparan sulfate / heparin	107308011|HS6ST3	1	45	28	6625	0.0357	0.174056	ns	0.456091	ns		0	107308011|HS6ST3	1	27	0.19245
cjo04912	Organismal Systems	Endocrine system	GnRH signaling pathway	107314843|LOC107314843, 107314846|LOC107314846	2	45	112	6625	0.0179	0.176122	ns	0.456091	ns	107314846|LOC107314846	1	107314843|LOC107314843	1	106	2.0397
cjo00030	Metabolism	Carbohydrate metabolism	Pentose phosphate pathway	107307715|LOC107307715	1	45	29	6625	0.0345	0.17969	ns	0.456091	ns		0	107307715|LOC107307715	1	29	-1.85695
cjo00512	Metabolism	Glycan biosynthesis and metabolism	Mucin type O-glycan biosynthesis	107306219|GCNT1	1	45	30	6625	0.0333	0.185287	ns	0.456091	ns	107306219|GCNT1	1		0	30	0.182574
cjo01040	Metabolism	Lipid metabolism	Biosynthesis of unsaturated fatty acids	107314410|LOC107314410	1	45	32	6625	0.0312	0.196368	ns	0.461378	ns	107314410|LOC107314410	1		0	32	1.06066
cjo04136	Cellular Processes	Transport and catabolism	Autophagy - other	107306515|LOC107306515	1	45	33	6625	0.0303	0.201853	ns	0.461378	ns	107306515|LOC107306515	1		0	32	-1.23744
cjo00240	Metabolism	Nucleotide metabolism	Pyrimidine metabolism	107310980|LOC107310980, 107307792|LOC107307792	2	45	126	6625	0.0159	0.210684	ns	0.462729	ns	107307792|LOC107307792	1	107310980|LOC107310980	1	124	1.88586
cjo04060	Environmental Information Processing	Signaling molecules and interaction	Cytokine-cytokine receptor interaction	107313501|LOC107313501, 107306941|LOC107306941, 107306797|LOC107306797	3	45	237	6625	0.0127	0.216904	ns	0.462729	ns	107313501|LOC107313501, 107306797|LOC107306797	2	107306941|LOC107306941	1	203	2.66708
cjo04015	Environmental Information Processing	Signal transduction	Rap1 signaling pathway	107305868|FYB	1	45	39	6625	0.0256	0.234003	ns	0.468006	ns	107305868|FYB	1		0	37	1.64399
cjo00760	Metabolism	Metabolism of cofactors and vitamins	Nicotinate and nicotinamide metabolism	107307792|LOC107307792	1	45	39	6625	0.0256	0.234003	ns	0.468006	ns	107307792|LOC107307792	1		0	39	0.160128
cjo00980	Metabolism	Xenobiotics biodegradation and metabolism	Metabolism of xenobiotics by cytochrome P450	107312110|LOC107312110	1	45	41	6625	0.0244	0.244436	ns	0.469835	ns		0	107312110|LOC107312110	1	39	-0.640513
cjo00350	Metabolism	Amino acid metabolism	Tyrosine metabolism	107324276|LOC107324276	1	45	42	6625	0.0238	0.2496	ns	0.469835	ns	107324276|LOC107324276	1		0	37	0.328798
cjo00830	Metabolism	Metabolism of cofactors and vitamins	Retinol metabolism	107315949|LOC107315949	1	45	44	6625	0.0227	0.259825	ns	0.475108	ns	107315949|LOC107315949	1		0	39	1.76141
cjo05164	Human Diseases	Infectious disease: viral	Influenza A	107315362|HSPA2, 107313501|LOC107313501	2	45	149	6625	0.0134	0.268704	ns	0.475387	ns	107315362|HSPA2, 107313501|LOC107313501	2		0	135	1.97952
cjo04217	Cellular Processes	Cell growth and death	Necroptosis	107314843|LOC107314843, 107314846|LOC107314846	2	45	153	6625	0.0131	0.278848	ns	0.475387	ns	107314846|LOC107314846	1	107314843|LOC107314843	1	147	1.23718
cjo04514	Environmental Information Processing	Signaling molecules and interaction	Cell adhesion molecules	107321064|ALCAM, 107312820|CLDN2	2	45	155	6625	0.0129	0.283918	ns	0.475387	ns	107321064|ALCAM	1	107312820|CLDN2	1	137	0.59805
cjo00330	Metabolism	Amino acid metabolism	Arginine and proline metabolism	107324276|LOC107324276	1	45	50	6625	0.02	0.289689	ns	0.475387	ns	107324276|LOC107324276	1		0	49	-1
cjo04261	Organismal Systems	Circulatory system	Adrenergic signaling in cardiomyocytes	107319715|LOC107319715, 107325717|RAPGEF3	2	45	171	6625	0.0117	0.324343	ns	0.511502	ns	107325717|RAPGEF3	1	107319715|LOC107319715	1	163	0.704934
cjo00480	Metabolism	Metabolism of other amino acids	Glutathione metabolism	107312110|LOC107312110	1	45	58	6625	0.0172	0.327681	ns	0.511502	ns		0	107312110|LOC107312110	1	56	-2.80624
cjo04622	Organismal Systems	Immune system	RIG-I-like receptor signaling pathway	107313501|LOC107313501	1	45	66	6625	0.0152	0.363684	ns	0.542997	ns	107313501|LOC107313501	1		0	65	2.10859
cjo00983	Metabolism	Xenobiotics biodegradation and metabolism	Drug metabolism - other enzymes	107312110|LOC107312110	1	45	67	6625	0.0149	0.36805	ns	0.542997	ns		0	107312110|LOC107312110	1	63	-0.125988
cjo04010	Environmental Information Processing	Signal transduction	MAPK signaling pathway	107315362|HSPA2, 107314843|LOC107314843, 107314846|LOC107314846	3	45	321	6625	0.0093	0.37331	ns	0.542997	ns	107315362|HSPA2, 107314846|LOC107314846	2	107314843|LOC107314843	1	311	3.17547
cjo04920	Organismal Systems	Endocrine system	Adipocytokine signaling pathway	107320337|C1QTNF2	1	45	83	6625	0.012	0.434044	ns	0.607442	ns		0	107320337|C1QTNF2	1	78	0.566139
cjo00230	Metabolism	Nucleotide metabolism	Purine metabolism	107311456|LOC107311456, 107307792|LOC107307792	2	45	217	6625	0.0092	0.436599	ns	0.607442	ns	107307792|LOC107307792	1	107311456|LOC107311456	1	213	0.959264
cjo03320	Organismal Systems	Endocrine system	PPAR signaling pathway	107320337|C1QTNF2	1	45	89	6625	0.0112	0.457013	ns	0.622315	ns		0	107320337|C1QTNF2	1	79	1.68763
cjo05132	Human Diseases	Infectious disease: bacterial	Salmonella infection	107313501|LOC107313501	1	45	96	6625	0.0104	0.482659	ns	0.643545	ns	107313501|LOC107313501	1		0	86	3.01932
cjo04620	Organismal Systems	Immune system	Toll-like receptor signaling pathway	107313501|LOC107313501	1	45	100	6625	0.01	0.496778	ns	0.648841	ns	107313501|LOC107313501	1		0	92	2.71069
cjo04350	Environmental Information Processing	Signal transduction	TGF-beta signaling pathway	107306941|LOC107306941	1	45	104	6625	0.0096	0.51052	ns	0.648841	ns		0	107306941|LOC107306941	1	99	1.80907
cjo04810	Cellular Processes	Cell motility	Regulation of actin cytoskeleton	107312710|LOC107312710, 107316198|LOC107316198	2	45	255	6625	0.0078	0.521794	ns	0.648841	ns	107316198|LOC107316198	1	107312710|LOC107312710	1	243	2.75845
cjo04933	Human Diseases	Endocrine and metabolic disease	AGE-RAGE signaling pathway in diabetic complications	107313501|LOC107313501	1	45	109	6625	0.0092	0.527183	ns	0.648841	ns	107313501|LOC107313501	1		0	106	1.94257
cjo03040	Genetic Information Processing	Transcription	Spliceosome	107315362|HSPA2	1	45	142	6625	0.007	0.624052	ns	0.737401	ns	107315362|HSPA2	1		0	140	-1.01419
cjo04140	Cellular Processes	Transport and catabolism	Autophagy - animal	107306515|LOC107306515	1	45	147	6625	0.0068	0.636923	ns	0.737401	ns	107306515|LOC107306515	1		0	143	0.919866
cjo04142	Cellular Processes	Transport and catabolism	Lysosome	107325409|LOC107325409	1	45	148	6625	0.0068	0.639445	ns	0.737401	ns	107325409|LOC107325409	1		0	146	1.32417
cjo04910	Organismal Systems	Endocrine system	Insulin signaling pathway	107307769|LOC107307769	1	45	157	6625	0.0064	0.661387	ns	0.737401	ns	107307769|LOC107307769	1		0	153	1.94029
cjo04621	Organismal Systems	Immune system	NOD-like receptor signaling pathway	107313501|LOC107313501	1	45	163	6625	0.0061	0.675284	ns	0.737401	ns	107313501|LOC107313501	1		0	158	3.50045
cjo04371	Environmental Information Processing	Signal transduction	Apelin signaling pathway	107307769|LOC107307769	1	45	163	6625	0.0061	0.675284	ns	0.737401	ns	107307769|LOC107307769	1		0	152	3.24443
cjo04120	Genetic Information Processing	Folding, sorting and degradation	Ubiquitin mediated proteolysis	107313236|LOC107313236	1	45	165	6625	0.0061	0.679791	ns	0.737401	ns		0	107313236|LOC107313236	1	165	0.544949
cjo04141	Genetic Information Processing	Folding, sorting and degradation	Protein processing in endoplasmic reticulum	107315362|HSPA2	1	45	172	6625	0.0058	0.695089	ns	0.741429	ns	107315362|HSPA2	1		0	168	0.154303
cjo04218	Cellular Processes	Cell growth and death	Cellular senescence	107313501|LOC107313501	1	45	179	6625	0.0056	0.709672	ns	0.744574	ns	107313501|LOC107313501	1		0	173	3.26923
cjo04530	Cellular Processes	Cellular community - eukaryotes	Tight junction	107312820|CLDN2	1	45	211	6625	0.0047	0.768104	ns	0.792881	ns		0	107312820|CLDN2	1	197	2.70739
cjo04020	Environmental Information Processing	Signal transduction	Calcium signaling pathway	107319715|LOC107319715	1	45	227	6625	0.0044	0.792837	ns	0.805421	ns		0	107319715|LOC107319715	1	207	4.03128
cjo04144	Cellular Processes	Transport and catabolism	Endocytosis	107315362|HSPA2	1	45	303	6625	0.0033	0.879229	ns	0.879229	ns	107315362|HSPA2	1		0	298	0.405499

## Sheet: 表格说明
	标题	说明		KEGG_Level_1		Rich.Factor		p值颜色	p值范围	Sig.Sign
	Pathway_ID	KEGG数据库的通路编号。点击进入官网查看此通路的详细信息。		Cellular Processes		1			[0, 0.0001)	****
	Pathway_Name	KEGG数据库的通路名称，属于KEGG的分类的第三级。		Drug Development		0.8			[0.0001, 0.001)	***
	KEGG_Level_1	KEGG的一级分类。		Environmental Information Processing		0.6			[0.001, 0.01)	**
	KEGG_Level_2	KEGG的二级分类。		Genetic Information Processing		0.4			[0.01, 0.05)	*
	IDs	此通路注释到的ID列表。点击查看这些基因在通路中的标记，注意多个ID可能位于同一个位置。		Human Diseases		0.2			[0.05, 1]	ns
	S	Significant ID Number：富集到此通路的ID个数。		Metabolism		0
	TS	Total Significant ID Number：全部差异显著ID的个数。		Organismal Systems
	B	Background ID Number：此通路中包含的ID总数。				ZScore
	TB	Total Background ID Number：全部背景ID个数。				4.28
	Rich.Factor	富集因子：S/B，值越大代表富集程度越高（颜色越深）。颜色对应关系见右表“Rich.Factor”。				3.42
	P.value	此通路的富集显著性，P值越小越显著。颜色对应关系见右表“p值颜色”。				2.57
	Sig.Sign.p	P值显著性标记：含义及颜色对应关系见右表“p值颜色”。				1.71
	Q.value	P值的校正值。颜色对应关系见右表“p值颜色”。				0.86
	Sig.Sign.Q	Q值显著性标记：含义及颜色对应关系见右表“p值颜色”。				0
	Up_ID	此GO条目注释到的ID列表中，上调的ID。				-0.86
	Up_Num	此GO条目注释到的ID列表中，上调的ID个数				-1.71
	Down_ID	此GO条目注释到的ID列表中，下调的ID。				-2.57
	Down_Num	此GO条目注释到的ID列表中，下调的ID个数。				-3.42
						-4.28
