# Supplementary material for: Cloning of the RNA m6A Methyltransferase 3 and Its Impact on the Proliferation and Differentiation of Quail Myoblasts
Source: Vet Sci. 2023 Apr 18;10(4):300. doi: 10.3390/vetsci10040300 (PMC10144998; doi:10.3390/vetsci10040300)
Supplement: Supplementary file 1 [file vetsci-10-00300-s001.zip › Table S3.xlsx]

## Sheet: Sheet 1
NAME	SIZE	ES	NES	NOM.pval	FDR.qval
MANNOSE_TYPE_O_GLYCAN_BIOSYNTHEIS	27	-0.6831579	-2.1232374	0.000000000	0.003330951
PENTOSE_PHOSPHATE_PATHWAY	29	-0.5922905	-1.8401185	0.002631579	0.046325788
RIBOSOME	124	-0.4409550	-1.8392197	0.000000000	0.031276330
OXIDATIVE_PHOSPHORYLATION	123	-0.4239779	-1.7452124	0.000000000	0.062373154
FRUCTOSE_AND_MANNOSE_METABOLISM	38	-0.4556975	-1.5122119	0.013262600	0.363454600
GLYCOSAMINOGLYCAN_DEGRADATION	21	-0.5082555	-1.4689803	0.048165140	0.411100200
GLUTATHIONE_METABOLISM	56	-0.3861780	-1.4146723	0.035040430	0.506101250
CARDIAC_MUSCLE_CONTRACTION	82	-0.3581378	-1.4016976	0.030219780	0.481799930
ARACHIDONIC_ACID_METABOLISM	61	-0.3804558	-1.3906076	0.049315070	0.455972520
GLYCOSPHINGOLIPID_BIOSYNTHESIS_LACTO_AND_NEOLACTO_SERIES	28	-0.4376691	-1.3690010	0.092233010	0.470338340
ARGININE_AND_PROLINE_METABOLISM	49	-0.3854350	-1.3685520	0.064432986	0.428497580
OTHER_GLYCAN_DEGRADATION	25	-0.4467286	-1.3590647	0.071759260	0.417879970
PROTEASOME	46	-0.3632353	-1.2935184	0.106598990	0.571358500
PHOTOTRANSDUCTION	31	-0.3946703	-1.2731504	0.127937330	0.594561300
PHAGOSOME	154	-0.2829852	-1.2378556	0.067278290	0.677755830
CALCIUM_SIGNALING_PATHWAY	207	-0.2728597	-1.2285720	0.059925094	0.667219900
GALACTOSE_METABOLISM	44	-0.3542400	-1.2112107	0.171794880	0.687803400
ADRENERGIC_SIGNALING_IN_CARDIOMYOCYTES	163	-0.2748348	-1.2029963	0.104956270	0.677476100
CITRATE_CYCLE_(TCA_CYCLE)	39	-0.3503309	-1.1843362	0.188861980	0.710123060
GLYCINE,_SERINE_AND_THREONINE_METABOLISM	42	-0.3464918	-1.1717705	0.212435230	0.717684600
N_GLYCAN_BIOSYNTHESIS	60	-0.3145910	-1.1686845	0.198324020	0.694020870
METABOLISM_OF_XENOBIOTICS_BY_CYTOCHROME_P450	39	-0.3367399	-1.1439180	0.257500000	0.753924500
DRUG_METABOLISM_CYTOCHROME_P450	36	-0.3450646	-1.1435957	0.244155840	0.722375040
GLYOXYLATE_AND_DICARBOXYLATE_METABOLISM	50	-0.3182419	-1.1169169	0.263959380	0.793331500
INTESTINAL_IMMUNE_NETWORK_FOR_IGA_PRODUCTION	37	-0.3312719	-1.1078285	0.281250000	0.797312560
GLYCOSYLPHOSPHATIDYLINOSITOL(GPI)_ANCHOR_BIOSYNTHESIS	28	-0.3485070	-1.0934302	0.320197050	0.821251900
GLYCOLYSIS_/_GLUCONEOGENESIS	63	-0.2900064	-1.0755973	0.318059300	0.861581150
CELL_ADHESION_MOLECULES_(CAMS)	137	-0.2540517	-1.0733454	0.289719600	0.839599670
NITROGEN_METABOLISM	17	-0.3776138	-1.0467547	0.401408460	0.919107000
ETHER_LIPID_METABOLISM	53	-0.2868349	-1.0389425	0.377094980	0.920509040
AXON_GUIDANCE	45	-0.3000088	-1.0323706	0.384615400	0.917297900
GLYCOSPHINGOLIPID_BIOSYNTHESIS_GANGLIO_SERIES	18	-0.3587369	-1.0199205	0.435897440	0.936066150
GLYCOSAMINOGLYCAN_BIOSYNTHESIS_HEPARAN_SULFATE_/_HEPARIN	27	-0.3270778	-1.0149056	0.424242440	0.926251900
ONE_CARBON_POOL_BY_FOLATE	18	-0.3586982	-0.9999345	0.457274820	0.960256160
BASE_EXCISION_REPAIR	37	-0.2985620	-0.9927083	0.476885650	0.961434600
ALCOHOLISM	25	-0.3224381	-0.9750312	0.486810560	1.000000000
GLYCOSAMINOGLYCAN_BIOSYNTHESIS_KERATAN_SULFATE	17	-0.3491918	-0.9575221	0.515662670	1.000000000
ALPHA_LINOLENIC_ACID_METABOLISM	29	-0.3045514	-0.9512988	0.525641000	1.000000000
GLYCOSPHINGOLIPID_BIOSYNTHESIS_GLOBO_AND_ISOGLOBO_SERIES	15	-0.3687329	-0.9505321	0.519138750	1.000000000
SYSTEMIC_LUPUS_ERYTHEMATOSUS	19	-0.3312477	-0.9329525	0.558823500	1.000000000
FERROPTOSIS	37	-0.2710324	-0.9187056	0.589147270	1.000000000
PYRUVATE_METABOLISM	49	-0.2551743	-0.9132196	0.608478800	1.000000000
VIRAL_CARCINOGENESIS	22	-0.3125226	-0.9100813	0.596977350	1.000000000
PURINE_METABOLISM	213	-0.1998689	-0.8993587	0.775510200	1.000000000
FATTY_ACID_DEGRADATION	41	-0.2622685	-0.8937915	0.651282100	1.000000000
FATTY_ACID_ELONGATION	32	-0.2693874	-0.8797198	0.687830700	1.000000000
TUBERCULOSIS	17	-0.3071989	-0.8538832	0.653395800	1.000000000
SNARE_INTERACTIONS_IN_VESICULAR_TRANSPORT	31	-0.2607540	-0.8391759	0.731266140	1.000000000
BIOSYNTHESIS_OF_UNSATURATED_FATTY_ACIDS	32	-0.2580315	-0.8373938	0.732696900	1.000000000
AMINO_SUGAR_AND_NUCLEOTIDE_SUGAR_METABOLISM	54	-0.2276836	-0.8366845	0.791237100	1.000000000
LINOLEIC_ACID_METABOLISM	36	-0.2453365	-0.8292769	0.772151900	1.000000000
THIAMINE_METABOLISM	15	-0.3085834	-0.8289333	0.652173940	1.000000000
OLFACTORY_TRANSDUCTION	15	-0.3106558	-0.8251638	0.700913250	1.000000000
LYSOSOME	146	-0.1914621	-0.8177629	0.929878060	1.000000000
OTHER_TYPES_OF_O_GLYCAN_BIOSYNTHESIS	34	-0.2456597	-0.8166184	0.788461570	1.000000000
PHENYLALANINE_METABOLISM	19	-0.2837767	-0.8162177	0.755196330	1.000000000
HEDGEHOG_SIGNALING_PATHWAY	46	-0.2315447	-0.8054183	0.805699470	1.000000000
GLYCOSAMINOGLYCAN_BIOSYNTHESIS_CHONDROITIN_SULFATE_/_DERMATAN_SULFATE	22	-0.2740029	-0.8047446	0.752809000	1.000000000
CYSTEINE_AND_METHIONINE_METABOLISM	56	-0.2201892	-0.8035068	0.820936600	1.000000000
ASCORBATE_AND_ALDARATE_METABOLISM	15	-0.2936372	-0.7932574	0.726829300	1.000000000
ADIPOCYTOKINE_SIGNALING_PATHWAY	78	-0.2030456	-0.7861822	0.905044500	1.000000000
GLYCEROLIPID_METABOLISM	71	-0.2112598	-0.7858080	0.867684500	1.000000000
PPAR_SIGNALING_PATHWAY	79	-0.1976733	-0.7690051	0.886297400	1.000000000
MUCIN_TYPE_O_GLYCAN_BIOSYNTHESIS	30	-0.2387277	-0.7660602	0.822384400	0.998976500
ERBB_SIGNALING_PATHWAY	91	-0.1919285	-0.7659549	0.924581000	0.983746000
LYSINE_DEGRADATION	79	-0.1948234	-0.7532257	0.924731200	0.984875100
EPSTEIN_BARR_VIRUS_INFECTION	18	-0.2557219	-0.7365025	0.834112170	0.989156070
PEROXISOME	92	-0.1867840	-0.7353059	0.964601760	0.975982800
AUTOPHAGY_OTHER_EUKARYOTES	32	-0.2190551	-0.6987596	0.930622000	0.993407850
AMINOACYL_TRNA_BIOSYNTHESIS	54	-0.1711459	-0.6159594	0.984886650	1.000000000
PROPANOATE_METABOLISM	43	-0.1648238	-0.5682278	0.992700760	1.000000000
DNA_REPLICATION	42	-0.1419122	-0.4885515	1.000000000	1.000000000
MISMATCH_REPAIR	24	-0.1580534	-0.4799240	0.997641500	0.998162870
TOLL_LIKE_RECEPTOR_SIGNALING_PATHWAY	92	0.4011282	1.4797145	0.015105740	1.000000000
PANTOTHENATE_AND_COA_BIOSYNTHESIS	21	0.5111898	1.4329306	0.065656565	1.000000000
NOTCH_SIGNALING_PATHWAY	72	0.3999091	1.4162447	0.031645570	1.000000000
INFLUENZA_A	135	0.3632383	1.4043496	0.016467066	1.000000000
CELLULAR_SENESCENCE	173	0.3483216	1.4022295	0.013005780	1.000000000
NEUROTROPHIN_SIGNALING_PATHWAY	16	0.5418639	1.3934917	0.091388404	0.921000600
BETA_ALANINE_METABOLISM	27	0.4749547	1.3894821	0.087565675	0.811474900
OXYTOCIN_SIGNALING_PATHWAY	17	0.5307642	1.3862575	0.097435900	0.725751300
ECM_RECEPTOR_INTERACTION	115	0.3645028	1.3773571	0.034074076	0.684359300
RIG_I_LIKE_RECEPTOR_SIGNALING_PATHWAY	65	0.3909035	1.3729252	0.049751244	0.635022500
MAPK_SIGNALING_PATHWAY	311	0.3196841	1.3679131	0.015604681	0.596540700
PROGESTERONE_MEDIATED_OOCYTE_MATURATION	87	0.3614845	1.3361999	0.055299540	0.670130550
NEUROACTIVE_LIGAND_RECEPTOR_INTERACTION	316	0.3083995	1.3180687	0.016371077	0.694418970
RIBOSOME_BIOGENESIS_IN_EUKARYOTES	86	0.3590402	1.3122590	0.083841465	0.667963860
HUMAN_PAPILLOMAVIRUS_INFECTION	15	0.5128731	1.2831208	0.186666670	0.743917050
RETINOL_METABOLISM	39	0.4101783	1.2703024	0.136915070	0.750362460
RAP1_SIGNALING_PATHWAY	37	0.4112543	1.2671318	0.155887230	0.718636630
C_TYPE_LECTIN_RECEPTOR_SIGNALING_PATHWAY	103	0.3365655	1.2613634	0.097978230	0.702237500
FATTY_ACID_BIOSYNTHESIS	18	0.4784620	1.2592323	0.192307700	0.672318000
AGE_RAGE_SIGNALING_PATHWAY_IN_DIABETIC_COMPLICATIONS	106	0.3367126	1.2590282	0.099702380	0.639555340
REGULATION_OF_ACTIN_CYTOSKELETON	243	0.2965873	1.2410289	0.057951484	0.674074770
CYTOKINE_CYTOKINE_RECEPTOR_INTERACTION	203	0.3013887	1.2293124	0.079096040	0.688648100
ALANINE,_ASPARTATE_AND_GLUTAMATE_METABOLISM	40	0.3879184	1.2200252	0.174418600	0.694019260
SELENOCOMPOUND_METABOLISM	20	0.4527725	1.2168077	0.214041100	0.676441900
MELANOGENESIS	101	0.3196720	1.2030362	0.144634530	0.699485540
WNT_SIGNALING_PATHWAY	166	0.2992345	1.1918458	0.128798840	0.713274960
DRUG_METABOLISM_OTHER_ENZYMES	63	0.3458093	1.1890001	0.189102560	0.696886240
STEROID_HORMONE_BIOSYNTHESIS	33	0.3892115	1.1857084	0.214754100	0.684341850
TGF_BETA_SIGNALING_PATHWAY	99	0.3197824	1.1838145	0.180758010	0.667353100
SALMONELLA_INFECTION	86	0.3261036	1.1737883	0.182370830	0.680083700
FOXO_SIGNALING_PATHWAY	146	0.3006175	1.1686794	0.136966120	0.676076530
RAS_SIGNALING_PATHWAY	35	0.3730140	1.1615946	0.226130650	0.680723600
GAP_JUNCTION	92	0.3168299	1.1608696	0.198449610	0.662315250
NOD_LIKE_RECEPTOR_SIGNALING_PATHWAY	158	0.2896628	1.1372651	0.214705880	0.726293270
CELL_CYCLE	131	0.2903932	1.1359574	0.229041920	0.709719400
FOCAL_ADHESION	238	0.2695803	1.1268723	0.192151560	0.723407900
PATHWAYS_IN_CANCER	41	0.3509185	1.1096407	0.300160530	0.765214800
CAMP_SIGNALING_PATHWAY	16	0.4262370	1.1029044	0.317689540	0.769995700
COMPLEMENT_AND_COAGULATION_CASCADES	16	0.4177835	1.0813571	0.371376800	0.829385800
UBIQUITIN_MEDIATED_PROTEOLYSIS	165	0.2705622	1.0804993	0.297653970	0.811805200
PYRIMIDINE_METABOLISM	124	0.2737426	1.0582495	0.327988330	0.872607050
PHOSPHATIDYLINOSITOL_SIGNALING_SYSTEM	128	0.2732916	1.0562847	0.361918600	0.858918960
SYNTHESIS_AND_DEGRADATION_OF_KETONE_BODIES	15	0.4016154	1.0257187	0.430879700	0.955017570
ENDOCYTOSIS	298	0.2404282	1.0212319	0.390957440	0.950731340
HOMOLOGOUS_RECOMBINATION	49	0.3098065	1.0161610	0.420000000	0.948273060
APELIN_SIGNALING_PATHWAY	152	0.2586631	1.0150625	0.437223050	0.931893170
VASCULAR_SMOOTH_MUSCLE_CONTRACTION	139	0.2601945	1.0131793	0.438914030	0.918270350
HTLV_I_INFECTION	15	0.4037556	1.0101037	0.461538460	0.909632700
CYTOSOLIC_DNA_SENSING_PATHWAY	44	0.3076641	0.9791067	0.504838700	1.000000000
PROTEOGLYCANS_IN_CANCER	17	0.3739653	0.9740255	0.493007000	0.997970600
ABC_TRANSPORTERS	47	0.2977516	0.9735476	0.509434000	0.979948900
MRNA_SURVEILLANCE_PATHWAY	103	0.2599067	0.9728987	0.514242900	0.963418960
OOCYTE_MEIOSIS	115	0.2569518	0.9720346	0.513137600	0.948123900
PI3K_AKT_SIGNALING_PATHWAY	19	0.3645973	0.9714980	0.480274440	0.931994140
RNA_DEGRADATION	87	0.2637351	0.9642506	0.533227860	0.938181200
TRANSCRIPTIONAL_MISREGULATION_IN_CANCERS	31	0.3232314	0.9620228	0.501650150	0.928500350
PORPHYRIN_AND_CHLOROPHYLL_METABOLISM	27	0.3293101	0.9553817	0.519725560	0.933610260
ADHERENS_JUNCTION	89	0.2569146	0.9462856	0.564465400	0.945601800
TRYPTOPHAN_METABOLISM	44	0.2992224	0.9451179	0.547967500	0.933528900
GNRH_SIGNALING_PATHWAY	106	0.2506926	0.9398533	0.569018400	0.934450500
INSULIN_SIGNALING_PATHWAY	153	0.2368368	0.9354079	0.592047150	0.932694600
HISTIDINE_METABOLISM	21	0.3438933	0.9300222	0.561224460	0.933456960
INOSITOL_PHOSPHATE_METABOLISM	95	0.2494199	0.9271221	0.602236450	0.927789870
MTOR_SIGNALING_PATHWAY	165	0.2253446	0.9020067	0.698435300	0.986881900
RNA_TRANSPORT	182	0.2224982	0.9011988	0.690376600	0.973944250
BASAL_TRANSCRIPTION_FACTORS	42	0.2796289	0.8994142	0.612349900	0.964418100
AUTOPHAGY_ANIMAL	143	0.2235473	0.8797747	0.719772400	1.000000000
PROTEIN_EXPORT	25	0.3040772	0.8777595	0.653910160	0.994166200
STEROID_BIOSYNTHESIS	21	0.3245481	0.8724666	0.675585270	0.993615270
VEGF_SIGNALING_PATHWAY	65	0.2482276	0.8650668	0.694704060	0.999022700
DOPAMINERGIC_SYNAPSE	15	0.3348744	0.8627562	0.635398200	0.990977600
FOLATE_BIOSYNTHESIS	39	0.2664376	0.8437136	0.702479360	1.000000000
NICOTINATE_AND_NICOTINAMIDE_METABOLISM	39	0.2618284	0.8362850	0.738013700	1.000000000
SALIVARY_SECRETION	15	0.3199153	0.8252076	0.704028000	1.000000000
PROTEIN_PROCESSING_IN_ENDOPLASMIC_RETICULUM	168	0.2067681	0.8234831	0.875169630	1.000000000
MICRORNAS_IN_CANCER	17	0.2970780	0.7802725	0.776816600	1.000000000
STARCH_AND_SUCROSE_METABOLISM	41	0.2405403	0.7627788	0.828947370	1.000000000
PENTOSE_AND_GLUCURONATE_INTERCONVERSIONS	22	0.2697369	0.7554008	0.826306940	1.000000000
BUTANOATE_METABOLISM	31	0.2540061	0.7550848	0.842546050	1.000000000
TYROSINE_METABOLISM	37	0.2401626	0.7480261	0.878887060	1.000000000
RNA_POLYMERASE	37	0.2310277	0.7297196	0.895446900	1.000000000
ARGININE_BIOSYNTHESIS	18	0.2797209	0.7288290	0.839059650	1.000000000
HERPES_SIMPLEX_INFECTION	173	0.1782831	0.7171173	0.992690100	1.000000000
VALINE,_LEUCINE_AND_ISOLEUCINE_DEGRADATION	69	0.2039144	0.7064425	0.930979130	1.000000000
APOPTOSIS	141	0.1784473	0.7011288	0.995548960	1.000000000
TIGHT_JUNCTION	197	0.1715354	0.6978209	0.992826400	1.000000000
P53_SIGNALING_PATHWAY	80	0.1927534	0.6950813	0.954751130	1.000000000
MITOPHAGY_ANIMAL	68	0.1990017	0.6950244	0.950769250	1.000000000
SPHINGOLIPID_METABOLISM	56	0.2053518	0.6950191	0.943217700	1.000000000
HIPPO_SIGNALING_PATHWAY	28	0.2350840	0.6926915	0.907056800	1.000000000
NECROPTOSIS	147	0.1750375	0.6896208	0.990853670	1.000000000
FANCONI_ANEMIA_PATHWAY	59	0.1982408	0.6730789	0.961672500	1.000000000
NUCLEOTIDE_EXCISION_REPAIR	53	0.1974348	0.6522583	0.959481360	1.000000000
GLYCEROPHOSPHOLIPID_METABOLISM	111	0.1715539	0.6431311	0.998502970	1.000000000
TERPENOID_BACKBONE_BIOSYNTHESIS	23	0.2137859	0.6039038	0.959860400	1.000000000
SPLICEOSOME	140	0.1535451	0.5963983	0.998509700	1.000000000
HIPPO_SIGNALING_PATHWAY_MULTIPLE_SPECIES	22	0.2023399	0.5602077	0.987632500	1.000000000
PRIMARY_BILE_ACID_BIOSYNTHESIS	15	0.1987279	0.4986871	0.984536100	1.000000000
RETROGRADE_ENDOCANNABINOID_SIGNALING	16	0.1632196	0.4206845	1.000000000	0.999544000
