# Supplementary material for: Cloning of the RNA m6A Methyltransferase 3 and Its Impact on the Proliferation and Differentiation of Quail Myoblasts
Source: Vet Sci. 2023 Apr 18;10(4):300. doi: 10.3390/vetsci10040300 (PMC10144998; doi:10.3390/vetsci10040300)
Supplement: Supplementary file 1 [file vetsci-10-00300-s001.zip › Table S4.txt]

NAME	SYMBOL	TITLE	RANK IN GENE LIST	RANK METRIC SCORE	RUNNING ES	CORE ENRICHMENT
row_0	LOC107307558	na	939	0.4632449746131897	-0.026682025	No
row_1	RPL3L	na	1874	0.3311190903186798	-0.060690194	No
row_2	MRPL32	na	2266	0.2967810332775116	-0.06581691	No
row_3	MRPS10	na	2727	0.2645409405231476	-0.07672196	No
row_4	MRPL14	na	3405	0.2260732799768448	-0.10217505	No
row_5	MRPL1	na	3560	0.21816399693489075	-0.098361045	No
row_6	MRPL22	na	4094	0.19147278368473053	-0.11762341	No
row_7	C1H12orf75	na	5332	0.13760070502758026	-0.17999783	No
row_8	MRPL23	na	5597	0.12559086084365845	-0.18776736	No
row_9	RSL24D1	na	5875	0.11500091105699539	-0.19688565	No
row_10	MRPS14	na	6085	0.10723134130239487	-0.20258695	No
row_11	MRPS6	na	6127	0.10534941405057907	-0.19884902	No
row_12	SRRD	na	6278	0.09958009421825409	-0.20163798	No
row_13	RPS24	na	6629	0.08600031584501266	-0.21657535	No
row_14	RPS15	na	6966	0.07392421364784241	-0.23141265	No
row_15	RPL36	na	7306	0.06142682582139969	-0.24714027	No
row_16	MRPS17	na	7474	0.05639452114701271	-0.2533828	No
row_17	RPL14	na	7758	0.046479467302560806	-0.26678884	No
row_18	RPS7	na	7817	0.04534682258963585	-0.26747313	No
row_19	MRPL19	na	7854	0.0439840592443943	-0.26698563	No
row_20	RPS15A	na	7875	0.043361250311136246	-0.26562467	No
row_21	MRPS15	na	8290	0.030088376253843307	-0.2874197	No
row_22	MRPL17	na	8541	0.02171112596988678	-0.30037695	No
row_23	RPL28	na	8734	0.015289691276848316	-0.31040785	No
row_24	LOC107307874	na	9009	0.005422217305749655	-0.32566726	No
row_25	RPL7L1	na	9086	0.002232797909528017	-0.3298578	No
row_26	MRPS16	na	9115	9.168647811748087E-4	-0.33139625	No
row_27	RPS27A	na	9912	-0.0029685895424336195	-0.37646285	No
row_28	RPL11	na	10021	-0.00750824436545372	-0.3821681	No
row_29	LOC107312565	na	10036	-0.007978685200214386	-0.3825042	No
row_30	MRPL15	na	10091	-0.01015943381935358	-0.3849879	No
row_31	MRPL33	na	10295	-0.017571255564689636	-0.39551252	No
row_32	MRPL16	na	10312	-0.01811276748776436	-0.39537856	No
row_33	RPL35A	na	10335	-0.018882928416132927	-0.3955412	No
row_34	RPL3	na	10346	-0.019244704395532608	-0.39500105	No
row_35	MRPL28	na	10589	-0.027284055948257446	-0.40718263	No
row_36	RPL31	na	10633	-0.028652597218751907	-0.40797603	No
row_37	MRPS18A	na	10635	-0.02870258130133152	-0.4063796	No
row_38	RPS21	na	10710	-0.03167140856385231	-0.40876088	No
row_39	RPL37	na	10968	-0.03979184105992317	-0.4210745	No
row_40	RPL27	na	11022	-0.04154692217707634	-0.4216935	No
row_41	MRPL3	na	11053	-0.04254189133644104	-0.42094806	No
row_42	MRPL12	na	11105	-0.04446232691407204	-0.42128548	No
row_43	RPS26	na	11170	-0.046682994812726974	-0.4222338	No
row_44	RPL21	na	11236	-0.048635631799697876	-0.42312646	No
row_45	RPS10	na	11240	-0.04869570583105087	-0.4204921	No
row_46	MRPL10	na	11343	-0.05201488360762596	-0.4232929	No
row_47	MRPL34	na	11442	-0.05533707141876221	-0.425675	No
row_48	RPL22L1	na	11625	-0.06180286034941673	-0.4324585	No
row_49	MRPL13	na	11670	-0.06363588571548462	-0.4312937	No
row_50	RPS28	na	11841	-0.06927438080310822	-0.43696487	Yes
row_51	RPS27	na	11869	-0.07024215906858444	-0.43445343	Yes
row_52	RPL27A	na	11889	-0.07099808007478714	-0.4314438	Yes
row_53	RPL9	na	11894	-0.07107464969158173	-0.42757732	Yes
row_54	RPS29	na	11939	-0.07285258173942566	-0.42588165	Yes
row_55	RPL5	na	12052	-0.07767759263515472	-0.4277726	Yes
row_56	MRPS9	na	12206	-0.08387177437543869	-0.43163684	Yes
row_57	RPL10	na	12296	-0.08741430938243866	-0.43165985	Yes
row_58	RPS25	na	12415	-0.09220901876688004	-0.4330548	Yes
row_59	RPS27L	na	12421	-0.09233035147190094	-0.42802083	Yes
row_60	MRPS11	na	12497	-0.09514351934194565	-0.426803	Yes
row_61	RPL7	na	12515	-0.09576953202486038	-0.42225292	Yes
row_62	RPL8	na	12522	-0.09615027904510498	-0.41705576	Yes
row_63	RPL19	na	12529	-0.09627244621515274	-0.41185156	Yes
row_64	MRPL2	na	12566	-0.09748101979494095	-0.4082827	Yes
row_65	RPL32	na	12678	-0.10200383514165878	-0.40871564	Yes
row_66	RPL29	na	12843	-0.10844792425632477	-0.41178945	Yes
row_67	MRPL20	na	12973	-0.11310585588216782	-0.4126059	Yes
row_68	RPS6	na	13014	-0.11482345312833786	-0.40826544	Yes
row_69	RPL10A	na	13181	-0.12135499715805054	-0.4107095	Yes
row_70	RPLP1	na	13186	-0.12148373574018478	-0.40393952	Yes
row_71	RPL13	na	13218	-0.12292829155921936	-0.39862075	Yes
row_72	MRPL18	na	13353	-0.1279904991388321	-0.398864	Yes
row_73	MRPL9	na	13365	-0.12846983969211578	-0.39208943	Yes
row_74	RPLP2	na	13432	-0.1314258575439453	-0.38827032	Yes
row_75	MRPL35	na	13445	-0.13175170123577118	-0.38136354	Yes
row_76	RPL12	na	13692	-0.14454889297485352	-0.38701814	Yes
row_77	RPL23	na	13731	-0.14626184105873108	-0.38075322	Yes
row_78	RPL7A	na	13762	-0.14785194396972656	-0.37394205	Yes
row_79	RPL24	na	13767	-0.14804911613464355	-0.3656419	Yes
row_80	LOC107306106	na	13938	-0.15795134007930756	-0.36620536	Yes
row_81	RPL18A	na	13941	-0.1579798012971878	-0.35721958	Yes
row_82	MRPS2	na	14057	-0.16373689472675323	-0.3543241	Yes
row_83	RPS4X	na	14123	-0.16769790649414062	-0.34835893	Yes
row_84	RPS3A	na	14153	-0.16891467571258545	-0.34027773	Yes
row_85	RPL38	na	14189	-0.17027512192726135	-0.33245918	Yes
row_86	RPLP0	na	14231	-0.17210084199905396	-0.32487643	Yes
row_87	RPL6	na	14261	-0.17373257875442505	-0.31651774	Yes
row_88	RPS2	na	14268	-0.17402015626430511	-0.30683538	Yes
row_89	RPS16	na	14273	-0.17428700625896454	-0.29702395	Yes
row_90	MRPL27	na	14545	-0.18849225342273712	-0.30156827	Yes
row_91	RPS23	na	14569	-0.18974296748638153	-0.2919464	Yes
row_92	RPS19	na	14614	-0.19246824085712433	-0.28336102	Yes
row_93	RPL26L1	na	14632	-0.19328713417053223	-0.27319402	Yes
row_94	RPS20	na	14662	-0.1953970193862915	-0.26358747	Yes
row_95	RPL4	na	14678	-0.19592057168483734	-0.25315517	Yes
row_96	MRPS5	na	14701	-0.19767649471759796	-0.2430195	Yes
row_97	MRPS7	na	14707	-0.19799335300922394	-0.23189947	Yes
row_98	RPS8	na	14716	-0.19873161613941193	-0.2209074	Yes
row_99	UBA52	na	14786	-0.2033657282590866	-0.21311513	Yes
row_100	RPL39	na	14908	-0.21209321916103363	-0.20777537	Yes
row_101	RPS14	na	14911	-0.21222589910030365	-0.19566506	Yes
row_102	RPSA	na	14980	-0.21620213985443115	-0.18707658	Yes
row_103	RPS3	na	15012	-0.21808208525180817	-0.17627707	Yes
row_104	RPS12	na	15028	-0.2197076678276062	-0.16447462	Yes
row_105	RPL35	na	15130	-0.22587278485298157	-0.15720455	Yes
row_106	LOC107325926	na	15324	-0.24021339416503906	-0.15433694	Yes
row_107	RPS17	na	15333	-0.240800142288208	-0.14092179	Yes
row_108	RPL34	na	15394	-0.24576592445373535	-0.13017581	Yes
row_109	MRPS18C	na	15399	-0.24603909254074097	-0.116231576	Yes
row_110	RPS13	na	15447	-0.24932852387428284	-0.1045416	Yes
row_111	RPS11	na	15475	-0.2514677345752716	-0.09159179	Yes
row_112	RPL15	na	15560	-0.25822901725769043	-0.08149191	Yes
row_113	RPL22	na	15590	-0.2608921527862549	-0.068112925	Yes
row_114	RPL23A	na	15781	-0.2756812572479248	-0.06303191	Yes
row_115	MRPS12	na	15859	-0.2826439142227173	-0.051127944	Yes
row_116	RPL37A	na	15889	-0.28612446784973145	-0.036295608	Yes
row_117	LOC107324643	na	16025	-0.30115506052970886	-0.026621621	Yes
row_118	RPL30	na	16039	-0.3023647367954254	-0.009944567	Yes
row_119	MRPL24	na	16095	-0.30914992094039917	0.0047363993	Yes
row_120	MRPL21	na	16107	-0.31024765968322754	0.021981163	Yes
row_121	RPS9	na	16276	-0.33214449882507324	0.03156468	Yes
row_122	MRPL30	na	16838	-0.4320254325866699	0.024566598	Yes
row_123	MRPS21	na	16886	-0.44175904989242554	0.04734035	Yes
