# Supplementary figures and images for: Cloning of the RNA m6A Methyltransferase 3 and Its Impact on the Proliferation and Differentiation of Quail Myoblasts
Source: MDPI journal article supplement (doi:10.3390/vetsci10040300), 2023-04-18

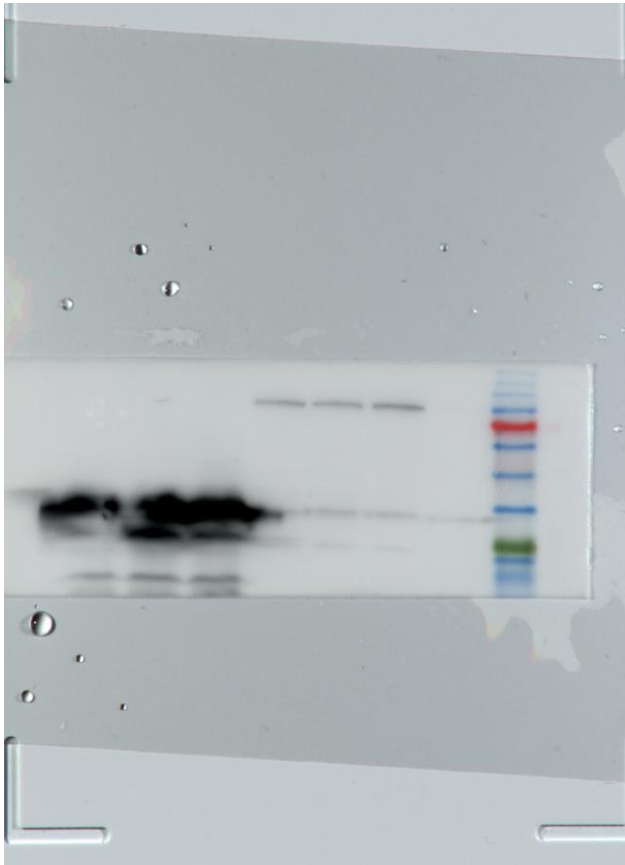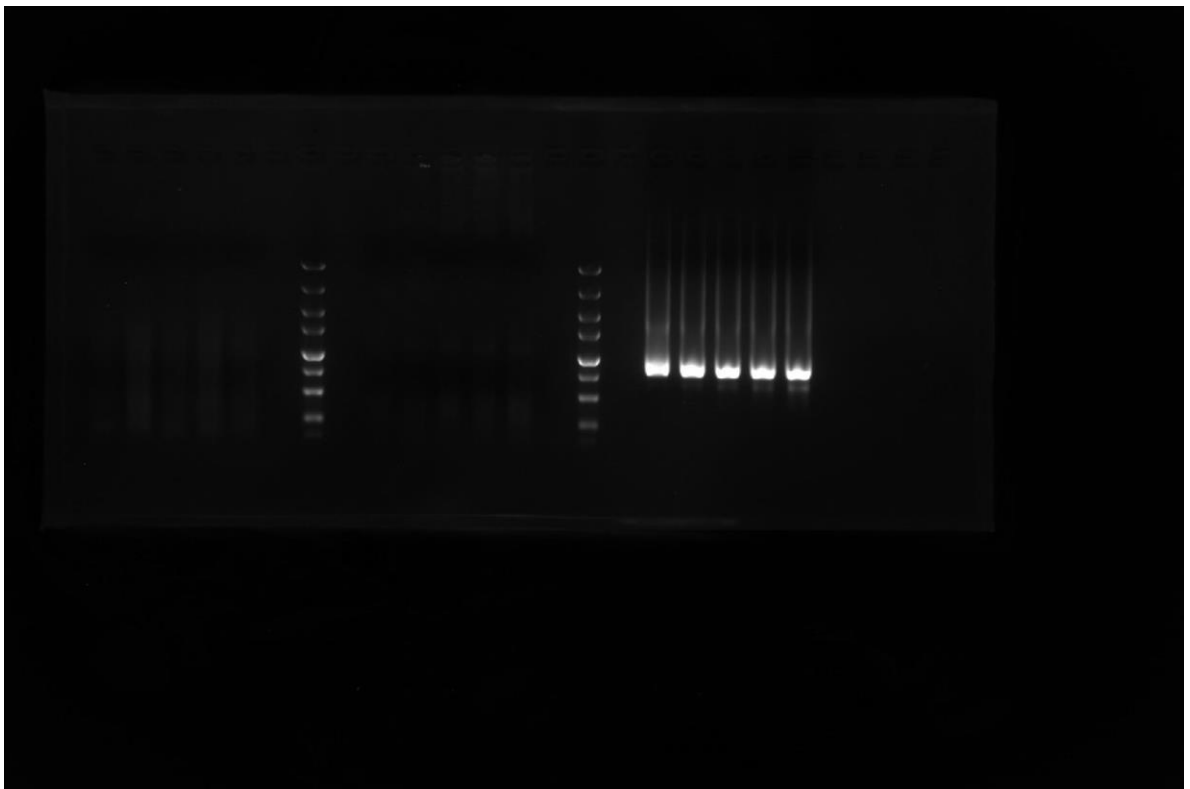

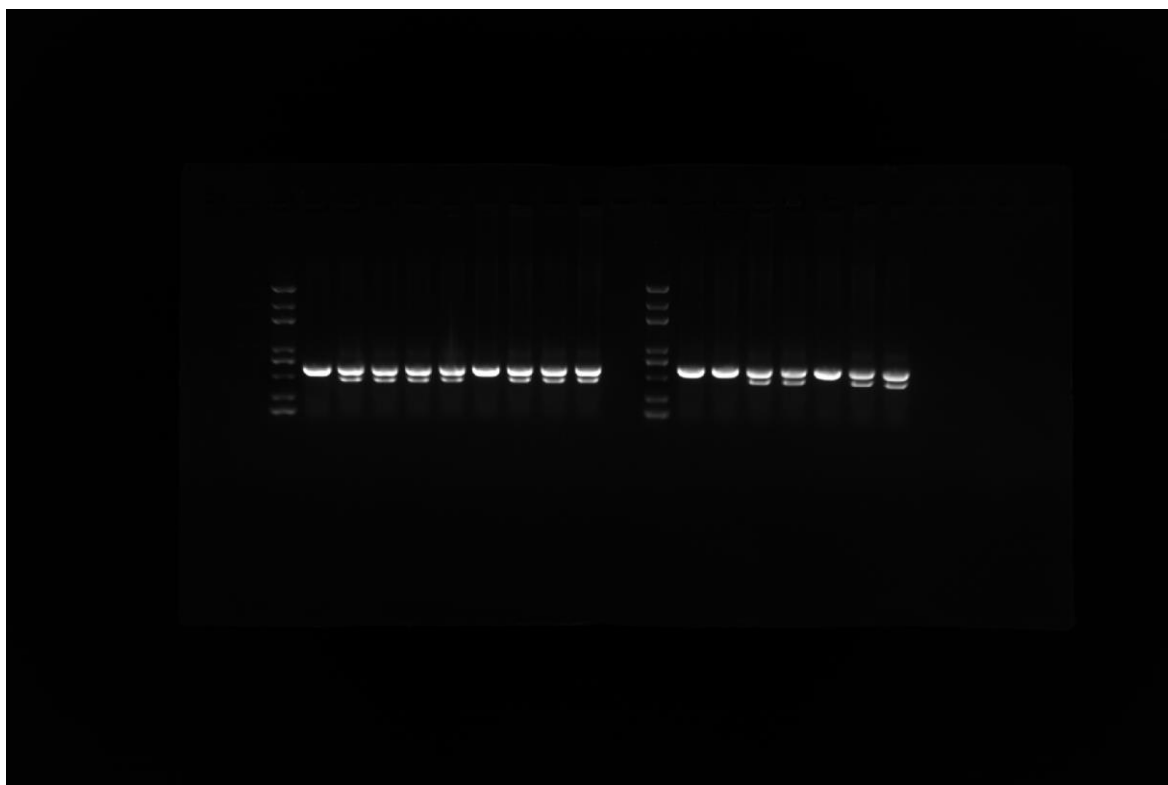

Figure S1: the WB full membrane and the full images of agarose gel electrophoresis of Figure 1

Supplement: s1 [file s1]
